## Stiffness Regulates Intestinal Stem Cell Fate

Shijie He<sup>1,2,3,4\*</sup>, Peng Lei<sup>1,2,3,4\*</sup>, Wenying Kang<sup>5</sup>, Priscilla Cheung<sup>4,6</sup>, Tao Xu<sup>4,7</sup>, Miyeko Mana<sup>8</sup>, Chan Young Park<sup>9</sup>, Hongyan Wang<sup>1,4</sup>, Shinya Imada<sup>8</sup>, Jacquelyn O. Russell<sup>4,6</sup>, Jianxun Wang<sup>1,2,3,4</sup>, Ruizhi Wang<sup>10</sup>, Ziheng Zhou<sup>1,2,3,4</sup>, Kashish Chetal<sup>4,11</sup>, Eric Stas<sup>4,12</sup>, Vidisha Mohad<sup>1,4</sup>, Marianna Halasi<sup>2,3,4</sup>, Peter Bruun-Rasmussen<sup>13</sup>, Ruslan I. Sadreyev<sup>4,11,14</sup>, Irit Adini<sup>2,3,4</sup>, Richard A. Hodin<sup>1,4</sup>, Yanhang Zhang<sup>10</sup>, David T. Breault<sup>4,12,15</sup>, Fernando D. Camargo<sup>4,6,15</sup>, Ömer H. Yilmaz<sup>8</sup>, Jeffrey J. Fredberg<sup>9</sup>, and Nima Saeidi<sup>1,2,3,4,15#</sup>

<sup>1</sup>Division of Gastrointestinal and Oncologic Surgery, Department of Surgery, Massachusetts General Hospital, Boston, MA 02114, USA

<sup>2</sup>Center for Engineering in Medicine and Surgery, Department of Surgery, Massachusetts General Hospital, Boston, MA 02114, USA

<sup>3</sup>Shriners Hospital for Children – Boston, MA 02114, USA

<sup>4</sup>Harvard Medical School, Boston, MA 02115, USA

<sup>5</sup>Department of Otolaryngology- Head and Neck Surgery, Stanford Medical School, CA 94305, USA

<sup>6</sup>Stem Cell Program and Department of Hematology/Oncology, Children's Hospital, Boston, MA 02115, USA

<sup>7</sup>Section on Pathophysiology and Molecular Pharmacology, Joslin Diabetes Center, Boston, MA 02115, USA

<sup>8</sup>Koch Institute for Integrative Cancer Research, Massachusetts Institute of Technology, Cambridge, MA 02142, USA

<sup>9</sup>Department of Environmental Health, Harvard T.H. Chan School of Public Health, Boston, MA 02115, USA

<sup>10</sup>Department of Mechanical Engineering, Boston University, Boston, MA 02215, USA

<sup>11</sup>Department of Molecular Biology, Massachusetts General Hospital, Boston, MA 02114, USA

<sup>12</sup>Division of Endocrinology, Boston Children's Hospital, Boston, MA 02115, USA

<sup>13</sup>Department of Clinical Immunology, Rigshospitalet, Copenhagen University Hospital, DK-2200, Copenhagen, Denmark

<sup>14</sup>Department of Pathology, Massachusetts General Hospital

<sup>15</sup>Harvard Stem Cell Institute, Cambridge, MA 02138, USA

\* Shijie He and Peng Lei contributed equally.

#Correspondence: Nima Saeidi (nsaeidi@mgh.harvard.edu)

## 32 **Summary**

33 **Does fibrotic gut stiffening caused by inflammatory bowel diseases (IBD) direct the fate of intestinal**  
34 **stem cells (ISCs)? To address this question we first developed a novel long-term culture of quasi-3D**  
35 **gut organoids plated on hydrogel matrix of varying stiffness. Stiffening from 0.6kPa to 9.6kPa**  
36 **significantly reduces Lgr5<sup>high</sup> ISCs and Ki67<sup>+</sup> progenitor cells while promoting their differentiation**  
37 **towards goblet cells. These stiffness-driven events are attributable to YAP nuclear translocation.**  
38 **Matrix stiffening also extends the expression of the stemness marker Olfactomedin 4 (Olfm4) into**  
39 **villus-like regions, mediated by cytoplasmic YAP. We next used single-cell RNA sequencing to**  
40 **generate for the first time the stiffness-regulated transcriptional signatures of ISCs and their**  
41 **differentiated counterparts. These signatures confirm the impact of stiffening on ISC fate and**  
42 **additionally suggest a stiffening-induced switch in metabolic phenotype, from oxidative**  
43 **phosphorylation to glycolysis. Finally, we used colon samples from IBD patients as well as chronic**  
44 **colitis murine models to confirm the *in vivo* stiffening-induced epithelial deterioration similar to**  
45 **that observed *in vitro*. Together, these results demonstrate stiffness-dependent ISC reprogramming**  
46 **wherein YAP nuclear translocation diminishes ISCs and Ki67<sup>+</sup> progenitors and drives their**  
47 **differentiation towards goblet cells, suggesting stiffening as potential target to mitigate gut epithelial**  
48 **deterioration during IBD.**

49 Upon migrating on the soft basement matrix (BM) from the bottom of the crypt to the tip of the villus,  
50 intestinal stem cells (ISCs) differentiate to diverse types of gut epithelial cells, including Paneth cells,  
51 goblet cells, enteroendocrine cells (EECs), tuft cells, microfold (M) cells and enterocytes <sup>1</sup>. Inflammatory  
52 bowel disease (IBD), which includes ulcerative colitis (UC) and Crohn's disease (CD), is associated with

53 the deterioration of gut epithelium, including reduction of ISCs <sup>2</sup> and increase of M cells in UC <sup>3</sup>.  
54 Furthermore, due to the excessive secretion of collagen, the BM stiffens <sup>4-6</sup>. It has been demonstrated that  
55 the stiffness of the BM can regulate the differentiation of mesenchymal stem cells, the progenitor cells of  
56 central nervous system and pancreatic progenitors <sup>7-9</sup>. Yet, it is unclear how the BM stiffening in IBD  
57 impacts the fate of ISCs and their differentiation, and contributes to the epithelium deterioration.

### 58 Quasi-3D gut organoids cultured on soft hydrogel matrix

59 To investigate the impact of BM stiffening on the differentiation of ISCs, we developed a platform  
60 for culturing quasi-3D gut organoids on top of soft polyacrylamide-hydrogel matrix (Fig. 1A). ISCs and  
61 their crypts were harvested from mice and seeded on the hydrogel matrix. *Lgr5-EGFPiRES-creERT2* mice  
62 were used to track *Lgr5*<sup>+</sup> ISCs (Extended Data Fig. 1). As the organoids grew, the soft hydrogel surface  
63 buckled (0.6 kPa, matching that of a healthy BM <sup>6</sup>), forming a quasi-3D structure that mimicked the  
64 invagination of the *in vivo* crypts ( Fig. 1A, and 3D confocal imaging in Fig. 1L). The crypt-like regions  
65 were densely populated by the ISCs intermixed with the large, optically dark, UEA<sup>+</sup> Paneth cells (Fig.  
66 1B). The peripheries of the crypts were surrounded by the transit-amplifying (TA) progenitor cells with  
67 strong Ki67 expression, and Ki67 was also weakly expressed in *Lgr5*<sup>high</sup> ISCs (Fig. 1B and Extended Data  
68 Fig. 2A). The villus-like regions were populated by Villin<sup>+</sup> enterocytes (Fig. 1B), Muc2<sup>+</sup> goblet cells, and  
69 Chromogranin-A<sup>+</sup> (Chro-A) EECs (Extended Data Fig. 2B). Notably, the villus-like regions also exhibited  
70 a turnover rate of approximately 3 days (Extended Data Fig. 3), similar to that observed *in vivo*. By  
71 culturing these quasi-3D gut organoids on the hydrogel matrix of varying stiffness, we analyzed the impact  
72 of stiffness on the fate of ISCs and their preference of differentiation directions.

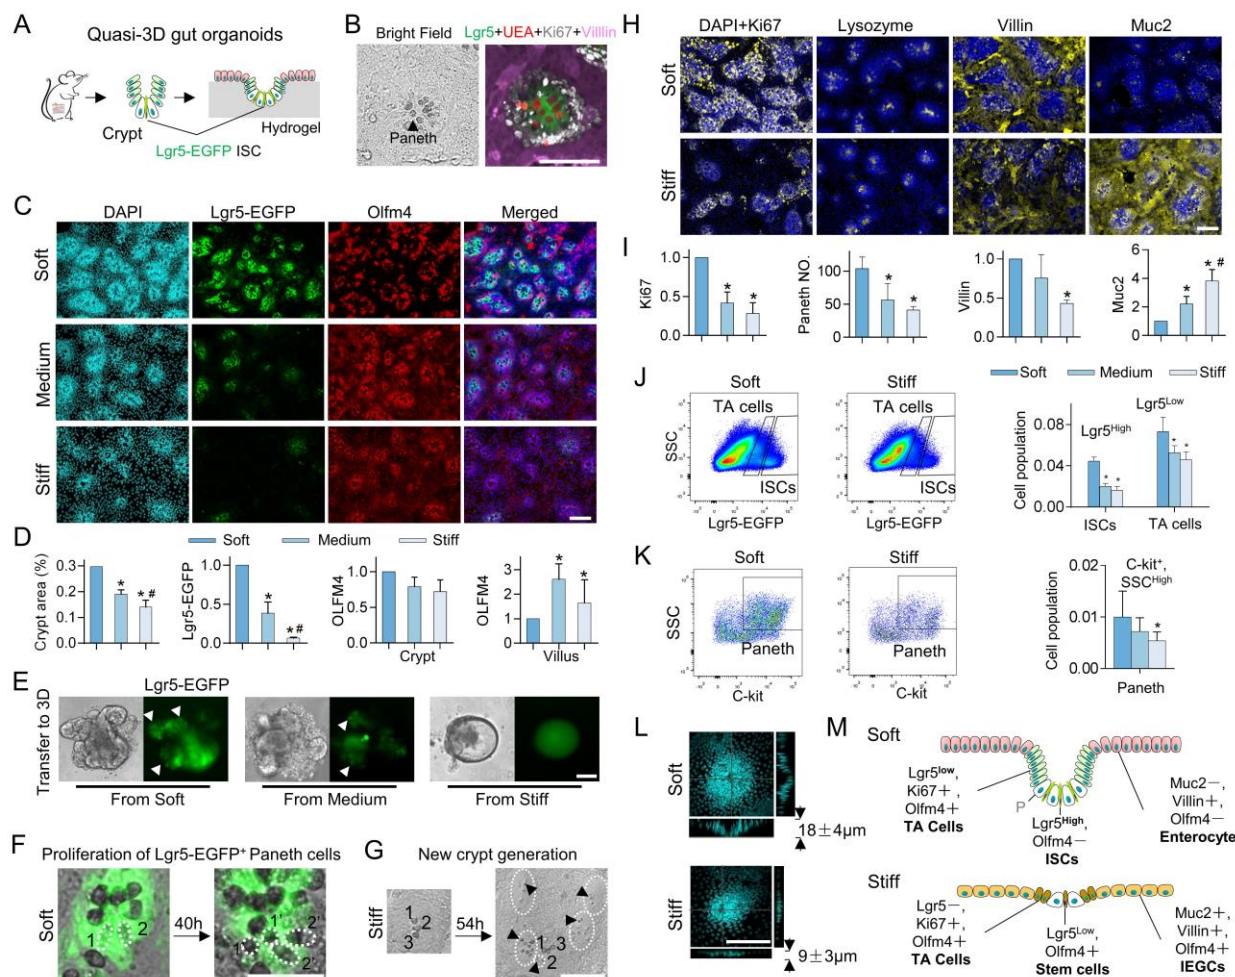

73

74 **Figure 1. Stiffness determines the fate of ISCs.** (A) Illustration of the experimental system. (B) Lgr5-EGFP<sup>+</sup> ISCs were intermixed with  
75 the optically dark UEA<sup>+</sup> Paneth cells, which were surrounded by Ki67<sup>+</sup> TA cells in the crypt-like regions. The villus-like regions were  
76 populated by Villin<sup>+</sup> differentiated cells. (C) The matrix stiffening from soft (0.6kPa) to medium (2.4kPa) to stiff (9.6kPa) reduced the size  
77 of the crypt-like regions with the dense nuclei and decreased the expression of Lgr5. Stiffening extended Olfm4 into the villus-like regions.  
78 (D) Quantification of the fluorescent intensity per unit area of crypt / villus regions. The crypt and villus regions were segmented using  
79 customized code based on DAPI intensity (Method,  $n=3-5$ ). (E) The 3D organoids derived from the soft and medium matrix budded with  
80 Lgr5-EGFP<sup>+</sup> ISCs (white arrows). The 3D organoids derived from the stiff matrix grew more like Lgr5-EGFP<sup>-</sup> cysts.  $n=3$ . (F) Lgr5-EGFP<sup>+</sup>  
81 ISCs (1 and 2) differentiated into two Paneth cells (1' and 2') on the soft matrix (Movie S1,  $n=3$ ). (G) On the stiff matrix cells in the villus-  
82 like regions differentiated into Paneth cells (black arrows), which was followed by the new crypt generation (white dashed line, Movie S2,  
83  $n=3$ ). (H) The stiffening decreased the expression of Ki67, Lysozyme and Villin, but increased Muc2, as quantified via fluorescent intensity  
84 (I,  $n=3-5$ ). (J and K) Flow cytometry analysis showed that stiffening decreased Lgr5<sup>high</sup> ISCs, Lgr5<sup>low</sup> TA cells, and Paneth cells ( $n=3$ ). (L)  
85 3D confocal imaging showed that the stiffening significantly inhibited the crypt invagination ( $P<0.05$ ,  $n=3$ ). (M) A schematic summarizes  
86 the impact of stiffening on all cell types. 'P', Paneth cell. Scale bar, 100  $\mu$ m. \* V.S. Soft and # V.S. Medium,  $P<0.05$  (Student's  $t$ -test).

87 **Stiffening reduces the number of Lgr5<sup>+</sup> ISCs and promotes their differentiation into**  
88 **immature enterocyte-goblet cells (IEGCs)**

89        Increasing the matrix stiffness from soft (0.6 kPa, matching that of a healthy BM <sup>6</sup>) to medium (2.4  
90 kPa) to stiff (9.6 kPa, matching that of an inflamed BM <sup>6</sup>) gradually decreased the crypts surface area and  
91 reduced the number of Lgr5-EGFP<sup>+</sup> ISCs (Fig. 1C and 10-days live-cell imaging for Lgr5-EGFP in  
92 Extended Data Fig. 4A). To further verify the impact of stiffness on ISCs, after 11 days of culture, the  
93 cells were detached from the hydrogel matrix and transferred to the inside of Matrigel<sup>®</sup> to grow 3D  
94 organoids (Method). The 3D organoids from the soft or medium matrix budded to form the crypt regions  
95 with the Lgr5-EGFP<sup>+</sup> ISCs, but those from the stiff matrix grew more like cysts with a significantly smaller  
96 number of buddings (Fig. 1E and quantified in Extended Data Fig. 4B), confirming the loss of stemness  
97 on the stiff matrix.

98        In addition to Lgr5, the expression and distribution of another stem cell marker, Olfactomedin 4  
99 (Olfm4), exhibited strong correlation with the stiffness. On the soft matrix, Olfm4<sup>+</sup> cells were concentrated  
100 in the periphery of the crypt-like regions (Fig. 1C and 1D). Upon increasing stiffness, Olfm4<sup>+</sup> cells became  
101 interspersed throughout the crypt region and replaced the Lgr5<sup>+</sup> ISCs to directly border with Paneth cells  
102 (Figs. 1C and Extended Data Fig. 5). Notably, on the stiff matrix, Olfm4 expression extended into the  
103 villus-like regions.

104        Live-cell imaging on the soft matrix showed that Lgr5-EGFP<sup>+</sup> ISCs divided and differentiated into  
105 large and optically dark Paneth cells (Fig. 1F and Movie S1) which, in turn, contributed to the maintenance  
106 of ISC niche and stemness <sup>10</sup>. In contrast, Lgr5-EGFP<sup>+</sup> ISCs greatly diminished on the stiff matrix (Fig.  
107 1C and Extended Data Fig. 4A). However, on the stiff matrix the cells in the villus-like regions  
108 differentiated into Paneth cells and ultimately generated ectopic, new crypt-like regions (Fig. 1G and  
109 Movie S2). The incidence of these ectopic crypts was approximately three-fold higher on the stiff matrix

110 compared to the soft matrix (Extended Data Fig. 4C and Movie S3).

111 Stiffening also altered the proportion of differentiated cells. Stiffening diminished Ki67<sup>+</sup> proliferating  
112 progenitor cells and Lysozyme<sup>+</sup> Paneth cells, as well as the expression of the enterocyte markers, Villin  
113 and Alpi<sup>11</sup> (Fig. 1H and I, and Alpi in Extended Data Fig. 6). The EEC marker - Chro-A was also  
114 decreased by stiffening (Extended Data Fig. 6). In contrast, markers of secretory progenitor cells- Dll1<sup>12</sup>  
115 and goblet cells- Muc2 were increased (Fig. 1H and I, and Dll1 in Extended Data Fig. 6). Notably, on the  
116 stiff matrix a new cell type emerged in the villus-like regions that co-expressed the markers for enterocytes,  
117 goblet cells, and stem cells (i.e., Villin, Muc2, and Olfm4, Fig. 1C, 1H and Extended Data Fig. 7). We  
118 named this new cell type the immature enterocyte-goblet cell (IEGC), where ‘immature’ refers to the co-  
119 expression of the different cell type markers. Flow cytometry analysis (Method) confirmed the reduction  
120 of ISCs (Lgr5-EGFP<sup>high</sup>), TA cells (Lgr5-EGFP<sup>low</sup>) and Paneth cells (CD24<sup>high</sup>, C-kit<sup>+</sup> and SSC<sup>high</sup>)<sup>13,14</sup>  
121 on the stiff matrix (Fig. 1J and K). Interestingly, 3D confocal imaging showed that the depth of the crypt-  
122 like regions was two-fold greater on the soft matrix compared to the stiff matrix (Fig. 1L).

123 The schematic in Fig. 1M summarizes the impact of stiffening on the various cell types: in the interior  
124 of crypt-like regions, stiffening led to the loss of Lgr5<sup>high</sup> ISCs cells and the appearance of Olfm4<sup>+</sup> stem  
125 cells which were directly adjacent to Paneth cells. It also reduced Lgr5<sup>low</sup>, Ki67<sup>+</sup> TA progenitor cells. In  
126 the villus-like regions, stiffening led to the replacement of the Villin<sup>+</sup> mature enterocytes by Muc2<sup>+</sup>, Villin<sup>+</sup>,  
127 and Olfm4<sup>+</sup> IEGCs.

## 128 The impacts of stiffness on ISC fate are YAP-dependent

129 Matrix stiffening stimulated YAP expression (Fig. 2A and 2D) and promoted YAP nuclear  
130 translocation (Fig. 2A and Extended Data Fig. 8). Lgr5<sup>high</sup> ISCs were YAP negative, and YAP expression

131 was inversely correlated with Lgr5 expression (Fig. 2A). To better distinguish the expression patterns of  
132 cytoplasmic YAP (cyto-YAP) and nuclear YAP (nuc-YAP), we performed immunostaining for non-  
133 phosphorylated YAP and the Ser 127 phosphorylated YAP, since YAP nuclear translocation is negatively  
134 regulated by YAP phosphorylation<sup>15</sup>. The non-phosphorylated YAP expression was uniformly increased  
135 across both the crypt- and villus-like regions on stiff matrix and showed pronounced nuclear localization  
136 (referred as nuc-YAP for simplicity in Fig. 2B, quantified in 2D). In contrast, phosphorylated YAP that is  
137 primarily cytoplasmic exhibited strong region-dependent expression, i.e., it was decreased by the  
138 stiffening in the crypt-like regions, but increased in the villus-like regions (referred as cyto-YAP in Fig.  
139 2C, quantified in 2D). To assess the relationship between YAP expression and the ISC differentiation  
140 trajectory, we counterstained total YAP with the markers of the differentiated cells. Proliferating cell  
141 marker (Ki67, Extended Data Fig. 9) and stem cell marker (Olfm4, Fig. 2E and crypt-like region in  
142 Extended Data Fig. 10) were both positively correlated with cyto-YAP, whereas goblet cell marker was  
143 positively correlated with nuc-YAP (Muc2, Fig. 2F). The Villin<sup>+</sup> enterocytes on the soft matrix were YAP  
144 negative, and the Villin expression tended to decrease when YAP showed nuclear localization on the stiff  
145 matrix (Fig. 2G). Notably, the epidermal growth factor receptor (Egfr) which is involved in the process of  
146 inflammation and cancer<sup>16</sup> was positively correlated with cyto-YAP (Extended Data Fig. 11), similar to  
147 the stem cell marker, Olfm4.

148

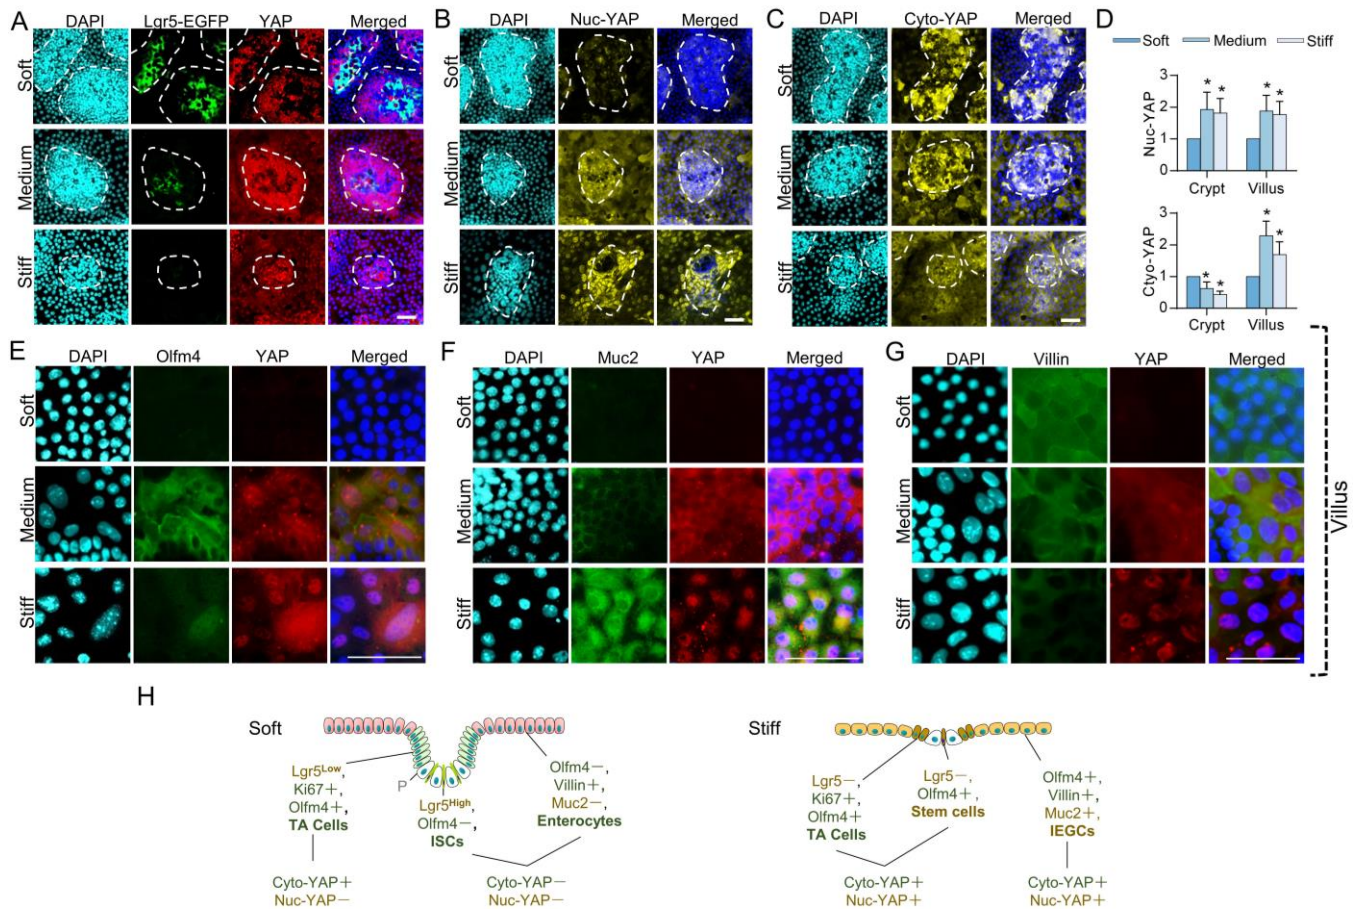

149

150

151

152

153

154

155

156

157

158

159

160

161

162

**Figure 2. Stiffness regulates the fate of ISCs via YAP** (A) Lgr5-EGFP<sup>high</sup> ISCs were YAP<sup>-</sup> and disappeared when YAP was nuclear co-localized on the stiff matrix. The white dashed lines trace the crypt-like regions ( $n=3$ ). (B) The non-phosphorylated nuclear (nuc-) YAP was increased by stiffening and showed clear nuclear co-localization on the stiff matrix ( $n=5$ ). (C) The Ser 127 phosphorylated cytoplasmic (cyto-) YAP was decreased by stiffening in the crypt-like regions, but increased in the villus-like regions, which were quantified via fluorescent intensity (D, \* V.S. Soft,  $P<0.05$ ,  $n=5$ ). (E) Olfm4 was highly expressed together with cyto-YAP ( $n=3$ ). (F) Muc2 was highly expressed in the YAP nuclear co-localized cells ( $n=3$ ). (G) Villin was highly expressed in the YAP<sup>-</sup> cells ( $n=3$ ). (H) The patterns of YAP were mapped onto all the cell types that were negatively (Green) or positively (Yellow) correlated with YAP nuclear translocation. Scale bar, 25  $\mu$ m.

Based on the expression patterns of the nuc- and cyto-YAP (Fig. 2) we hypothesized that they play divergent roles in regulating the ISC differentiation patterns, where nuc-YAP appears to drive the differentiation into goblet cells, while cyto-YAP drives the differentiation into TA cells, enterocytes, and Olfm4<sup>+</sup> stem cells (Fig. 2H). More specifically, on the soft matrix when the YAP<sup>-</sup> and Lgr5<sup>high</sup> ISCs migrate up, high cyto-YAP expression drives their differentiation into Ki67<sup>+</sup> TA cells (Extended Data Fig.



163 9). Continuously driven by cyto-YAP, the TA cells primarily mature into enterocytes, which lose YAP  
164 expression after maturation (Fig. 2G). On the stiff matrix the constitutive expression of YAP causes the  
165 loss of Lgr5<sup>high</sup> ISCs (Fig. 2A) and gain of Olfm4 instead (i.e., nuc-YAP<sup>+</sup>, cyto-YAP<sup>+</sup>, and Olfm4<sup>+</sup> stem  
166 cells). These Olfm4<sup>+</sup> stem cells have the potential to simultaneously differentiate into enterocytes driven  
167 by cyto-YAP and into goblet cells driven by nuc-YAP, which results in the new cell type, IEGCs (Fig.  
168 2H).

### 169 Nuc-YAP and cyto-YAP play divergent roles in determining the fate of ISCs

170 To test our hypothesis, transgenic mouse models were employed to knockout (KO) or overexpress (OE)  
171 YAP. Verteporfin (VP) was used to suppress YAP nuclear translocation<sup>17</sup>. YAP KO led to the loss of the  
172 villus-like regions (Fig. 3A), indicating the indispensability of YAP in the differentiation of ISCs and the  
173 generation of villi. The leftover crypt-like regions were enriched with Paneth cells and were negative for  
174 nuc-YAP and Muc2, as well as cyto-YAP, Olfm4, Villin, and Egfr (Extended Data Fig. 12). YAP OE  
175 induced by doxycycline (DOX) led to the disappearance of the large and dense crypt-like regions on the  
176 soft matrix (Fig. 3B), causing a shift towards the stiff matrix-like phenotypes. Conversely, VP  
177 administration on the stiff matrix led to the formation of large crypt-like regions (Fig. 3C) and the  
178 restoration of Lgr5 expression (Fig. 3D), bestowing soft matrix-like phenotypes.

179 Comparing the phenotypes between YAP OE and VP administration showed that nuc-YAP was  
180 increased in YAP OE but decreased in VP (Fig. 3E and 3G). In contrast, cyto-YAP was consistently  
181 increased in both models (Fig. 3F and 3H). Therefore, comparison of these two models enables us to  
182 discriminate the functional roles of nuc-YAP and cyto-YAP. Increasing nuc-YAP expression by OE  
183 promoted Muc2 (Fig. 3E), whereas decreasing nuc-YAP by VP suppressed Muc2 (Fig. 3G). Meanwhile,

184 the increase in cyto-YAP by both OE and VP persistently augmented the expression of Olfm4, Villin, and  
 185 Egfr (Fig. 3F and 3H, OE + Vehicle and Egfr in Extended Data Figs. 13 and 14). Nevertheless, YAP OE  
 186 did not significantly increase Villin expression, which is most-likely because the basal level of Villin  
 187 expression was saturated on the soft matrix (i.e., WT+DOX in Fig. 3D).

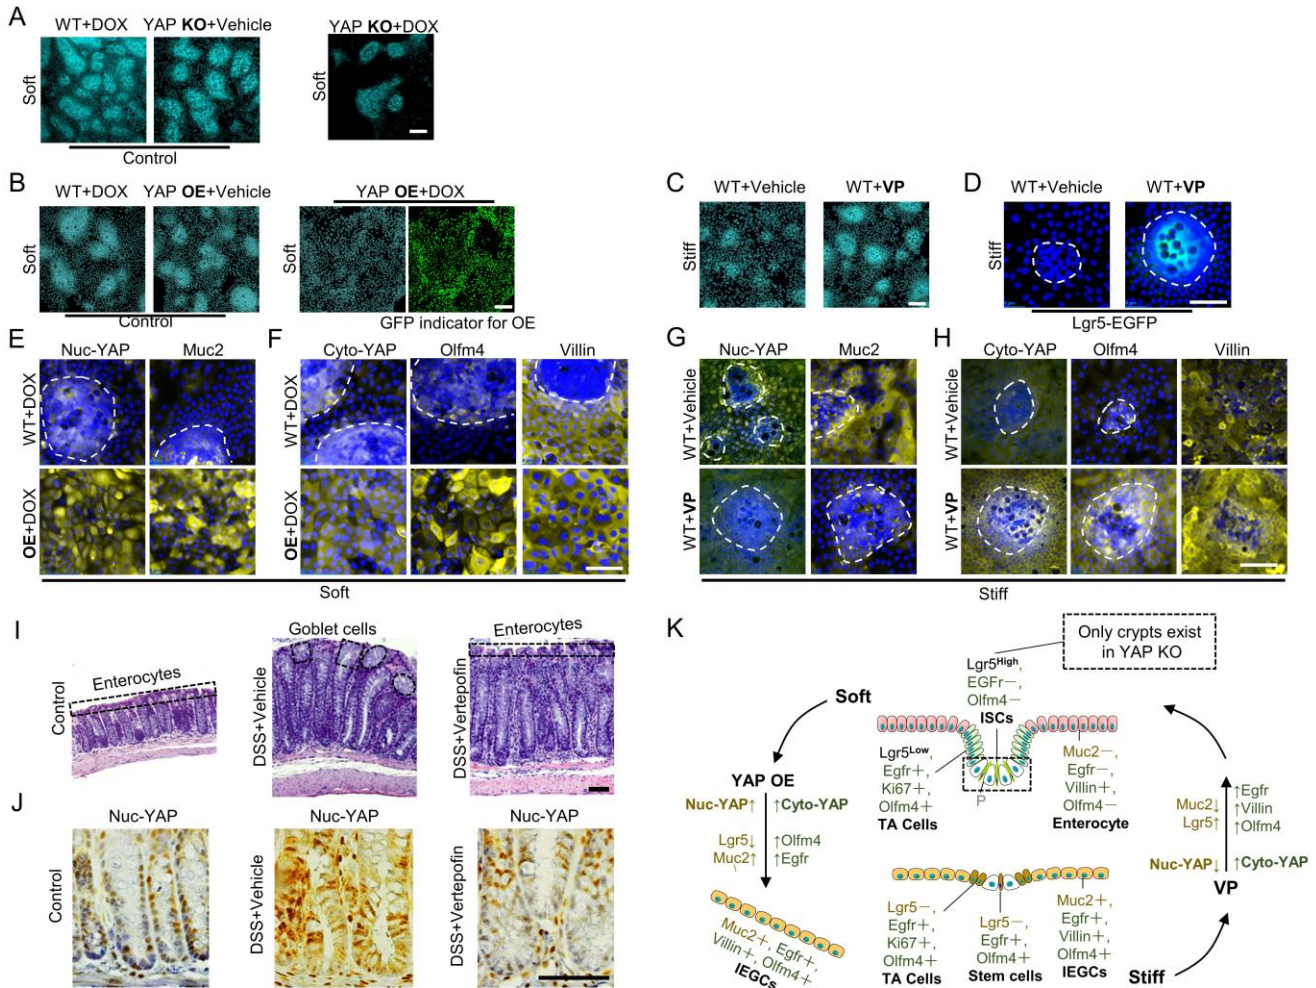

188  
 189 **Figure 3. The fate of ISCs was manipulated via YAP knockout (KO), overexpression (OE), and Verteporfin (VP).** (A) The villus-like  
 190 regions vanished in the YAP KO groups. (B) YAP OE led to the loss of the crypt-like regions on the soft matrix. (C and D) VP administration  
 191 increased the size of the crypt-like regions and resumed the Lgr5-EGFP expression on the stiff matrix. (E) Increase of nuc-YAP via OE  
 192 augmented Muc2. (F) Increase of cyto-YAP via OE augmented Olfm4. No significant changes of Villin were detected. (G) Decrease of nuc-  
 193 YAP via VP suppressed Muc2. (H) Increase of cyto-YAP via VP augmented Olfm4 and Villin. (I) Goblet cells replaced the enterocyte in the  
 194 colon brush border in DDS-induced colitis group, and VP reversed this replacement. (J) Nuc-YAP was increased in the DDS-induced colitis  
 195 group, but VP suppressed nuc-YAP. (K) YAP OE transformed the soft-matrix phenotypes into the stiff-matrix phenotypes, and VP did the

196 opposite. ‘Yellow’ indicates the regulation by nuc-YAP. ‘Green’, the regulation by cyto-YAP. The white dashed lines trace the crypt-like  
197 regions. Scale bars in A, B and E, 100  $\mu\text{m}$ ; I and J, 200  $\mu\text{m}$ ; the rest, 25  $\mu\text{m}$ .  $n=3$  for these experiments.

198 To assess the impact of tissue stiffness and VP *in vivo*, we administered VP in the dextran sulfate sodium  
199 (DSS)-induced chronic colitis mouse model (Method). In the colitis mouse the colon thickened (Fig. 3I  
200 and Extended Data Fig. 15A) and stiffened (Extended Data Fig. 15B). Moreover, colitis induced the  
201 replacement of enterocytes by goblet cells in the colon brush border, which was reversed by VP  
202 administration (Fig. 3I). Mechanistically, similar to the *in vitro* VP administration, the stiffened colon in  
203 the colitis mouse increased nuc-YAP which promoted the differentiation towards goblet cells, and VP  
204 suppressed the stiffening-induced increase of nuc-YAP as well as goblet cell differentiation (Fig. 3I and  
205 3J). The increase of cyto-YAP in the VP treatment group augmented the expression of Olfm4 and Egfr,  
206 which is also consistent with the *in vitro* observation (Extended Data Fig. 15D). Therefore, we  
207 demonstrated that YAP is indispensable for the ISC differentiation whereby nuc-YAP drives the  
208 differentiation towards Muc2<sup>+</sup> goblet cells, and cyto-YAP drives the differentiation towards Villin<sup>+</sup>  
209 enterocytes meanwhile promoting the expression of Egfr and Olfm4 (Fig. 3K).

## 210 Stiffness-regulated transcriptional signatures

211 We generated, for the first time, the stiffness-regulated transcriptional signatures of the ISCs and their  
212 differentiated cells using single-cell RNA sequencing (scRNAseq) analysis of our quasi-3D organoids.  
213 The single-cell expression profiles were clustered into thirteen cell groups (Fig. 4A) and the most highly  
214 expressed genes of each group were easily distinguishable (Supplementary Table 1). Using the known  
215 marker genes<sup>18</sup>, they were identified as various types of gut epithelial cells, matching the *in vivo* gut  
216 epithelium (Figs. 4A and 4B, and Extended Data Fig. 16). The clustering was consistent across both the  
217 soft and stiff matrix (Extended Data Fig. 17). Notably, two cell groups were identified as IEGCs which

218 expressed mild levels of marker genes for stemness, enterocytes, goblet cells as well as other secretory  
219 cell types (Fig. 4B).

220 The relative number of cells in each subset further confirmed the reduction in both ISCs and EECs, and  
221 the increase in goblet cells on the stiff matrix (Fig. 4C). Although stiffening appeared to increase the  
222 number of enterocytes (Fig. 4C), differential expression analysis (Supplementary Table 2) showed that  
223 the enterocytes on the stiff matrix expressed high levels of the goblet cell marker, Trefoil factor 3 (Tff3).  
224 In fact, Tff3 was upregulated across most of the cells on the stiff matrix (Fig. 4D), which was also  
225 confirmed at the protein level (Extended Data Fig. 18). These results suggest a preferential differentiation  
226 of ISCs towards goblet cells on the stiff matrix. In addition, the stiffening significantly increased M cells  
227 and decreased tuft cells (Fig. 4C).

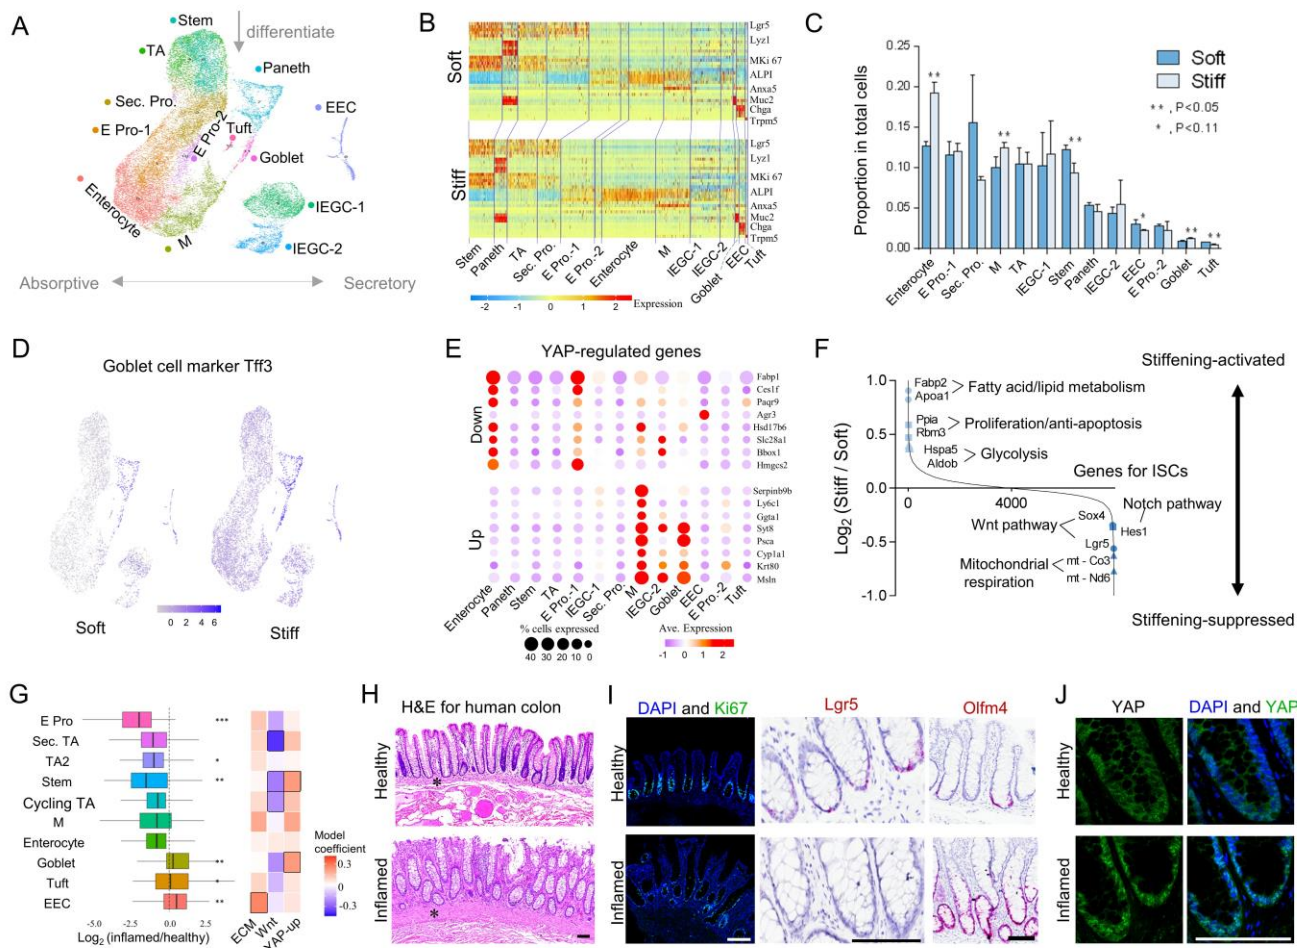

228  
 229 **Figure 4. Single cell RNA sequencing and histology from IBD patient.** (A) UMAP plot with the cell clusters (marked by color) including  
 230 ISCs and the differentiated cells. ‘Sec’, secretory; ‘Pro’, progenitor; ‘E’, enterocyte; ‘M’, microfold. (B) Heat map for marker genes of each  
 231 cell type (Extended Data Fig. 16 for full version). (C) The proportions of each cell type on the soft and stiff matrix. (D) Expression of Tff3  
 232 was higher on the stiff matrix than on the soft matrix. (E) The genes downregulated by YAP were highly expressed in enterocytes and E pro.-  
 233 1; however, the genes upregulated by YAP were highly expressed in goblet cells, IEGCs-1 and M cells. (F) Differential gene expression  
 234 analysis in ISCs showed that stiffening suppressed both Wnt signaling (e.g., Lgr5 and Sox4 genes), and Notch signaling (e.g., Hes1), and  
 235 possibly switched metabolic phenotype from mitochondrial respiration (e.g., downregulated mt-Co3 and me-No6) to glycolysis (e.g.,  
 236 upregulated Hspa5 and Aldob).  $n=3$  for A-F. (G) Compared to healthy individuals ( $n=5$ ), relative proportions of cell types in IBD patients  
 237 ( $n=3$ ) showed a decrease of ISCs, an increase of goblet cells and a trend towards a decrease of enterocytes.  $*P<0.05$ ,  $**P<0.01$ ,  $***P<0.001$ .  
 238 Pathway enrichment analysis shows that in IBD patients ECM secretion is activated in EECs, Wnt signaling is suppressed in ISCs and the  
 239 YAP up-regulated genes are highly expressed in ISCs and goblet cells. Model coefficients are output of linear mixed model from gene  
 240 signatures associated with the respective pathways. Black outline for each box represents  $P<0.05$  for linear mixed model and  $P<0.05$  for  
 241 pathway enrichment (Method). (H) H&E staining shows the thickening of BM and lamina propria labelled with asterisks, and the  
 242 disappearance of the enterocyte brush border in the human inflamed colon. (I) Ki67<sup>+</sup> proliferating cells and Lgr5<sup>+</sup> ISCs were decreased, and  
 243 Olfm4<sup>+</sup> cells were increased in the inflamed colon. Lgr5 and Olfm4 were stained via in situ hybridization. (J) YAP showed more nuclear  
 244 localization in the inflamed colon.  $n=3$  for human colon resection samples. Scale bar, 200  $\mu\text{m}$ .

245 We next assessed the expression of the YAP-up or down regulated genes (curated by Gregorieff et al.

246 <sup>19</sup>) in all the cell types. The YAP-downregulated genes (e.g., *Fabp1* and *Ces1f*) were highly expressed in  
247 enterocytes and their progenitors, whereas the YAP-upregulated genes (e.g., *Msln* and *Syt8*) were enriched  
248 in goblet cells, IEGCs, and M cells (Fig. 4E and more YAP-regulated genes in Extended Data Figs. 19  
249 and 20). These results further suggested that YAP could positively drive the differentiation of ISCs  
250 towards goblet cells as well as M- cells instead of enterocytes. Furthermore, the expression of the  
251 downstream genes of nuc-YAP, *Id2*, *Birc5*, and *Areg* <sup>20</sup> significantly increased on the stiff matrix  
252 (Extended Data Fig. 21). These results together with our experimental observations (Fig. 2F) indicate that  
253 nuc-YAP drives the ISC differentiation towards goblet cells.

254 Stiffening suppressed both Wnt signaling (e.g., *Lgr5* and *Sox4* genes) and Notch signaling (e.g., *Hes1*)  
255 in ISCs (Fig. 4F). Wnt is indispensable for maintaining the stemness of *Lgr5*<sup>+</sup> ISCs <sup>21</sup>. Therefore, the  
256 stiffening-induced suppression of Wnt signaling could mediate the loss of *Lgr5*<sup>high</sup> ISCs. Furthermore, the  
257 suppression of the Notch pathway could drive the differentiation of ISCs towards goblet cells instead of  
258 enterocytes <sup>22</sup>, which is also in accordance with the stiffening-enhanced goblet cell differentiation. In  
259 addition, the differential expression analysis suggests a stiffening-induced metabolic reprogramming of  
260 ISCs, including an increase in glycolysis and a decrease in mitochondrial respiration (Fig. 4F).  
261 Furthermore, compared to the soft matrix, pathways involved in carbon metabolism are more enriched on  
262 the stiff matrix (Pathway enrichment analysis in Extended Data Fig. 22). The mechanotransduction  
263 signaling pathways including actin cytoskeleton, focal adhesion and tight junctions were also upregulated  
264 on the stiff matrix, which could potentially contribute to YAP activation (Extended Data Fig. 22).

265 To determine the extent to which the stiffening-induced remodeling of the murine gut epithelium  
266 resembles that in human IBD patients, we analyzed the scRNAseq data of colon epithelium (generated by

267 Smillie et al.<sup>3</sup>) and colon resection samples, from IBD patients and healthy individuals. The human single  
268 cell profiles were clustered into ten epithelial cell subsets which were annotated using the known marker  
269 genes (tSNE in Extended Data Fig. 23A and marker genes in 23B). The relative proportions of each cell  
270 type demonstrate that UC is associated with a decrease in ISCs, an increase in goblet cells, and a trend  
271 towards a decrease in enterocytes (Fig. 4G and Extended Data Fig. 23C, with and without accounting for  
272 sample size, respectively). Pathway enrichment analysis demonstrates a strong activation of pathways  
273 involved in extracellular matrix biosynthesis (including collagen I and IV) in UC, indicating fibrosis and  
274 stiffening (Fig. 4G). Concomitantly, Wnt signaling was suppressed in the ISCs of UC patients (Fig. 4G  
275 and Extended Data Fig. 23D). The cluster of genes that have been previously shown to be directly  
276 upregulated by YAP<sup>19</sup> were highly enriched in both ISCs and goblet cells of UC-derived tissues,  
277 indicating the upregulation of YAP in these cells (Fig. 4G). In addition, there is a strong activation of the  
278 mechanosignaling pathway, including integrins, YAP, and TEADs (the primary transcription factors for  
279 YAP), in both the ISCs and the goblet cells of UC, but not in enterocytes (Extended Data Fig. 23E).  
280 Together, these results suggest a mechanosignaling-induced ISC reprogramming in UC, where the BM  
281 stiffening-induced upregulated integrin signaling promotes the expression of YAP as well as its interaction  
282 with TEAD in the nuclei, which potentially suppresses Wnt signaling in ISCs and drives their  
283 differentiation towards goblet cells.

284 Human UC colon samples showed the disappearance of the enterocyte brush border and the thickening  
285 of BM and lamina propria (Fig. 4H). The excessive collagen deposition confirmed the occurrence of  
286 fibrosis (Extended Data Fig. 24A-C). Meanwhile, similar to our *in vitro* observations, Muc2<sup>+</sup> goblet cells  
287 were overwhelmingly present in the inflamed colon compared to the healthy colon (Extended Data Fig.

288 24D). The number of Ki67<sup>+</sup> proliferating cells and Lgr5<sup>+</sup> ISCs were significantly decreased in the inflamed  
289 samples (Fig. 4I). Nevertheless, Olfm4 expression was increased and extended into larger regions (Fig. 4I  
290 and Extended Data Fig. 24E). Notably, there is a strong YAP nuclear localization in the inflamed samples  
291 which could be induced by BM fibrosis and stiffening (Fig. 4J). In the extremely fibrotic strictured ileum  
292 of CD patient, the samples exhibited a complete loss of the normal invaginated crypt structures (Extended  
293 Data Fig. 25). Meanwhile, a large number of ectopic crypts were formed in the hyperplastic BM and  
294 lamina propria. These phenotypes of the strictured ileum closely resemble the *in vitro* stiffening-induced  
295 decrease of crypt size and the formation of ectopic crypts (Fig. 1G). The scRNAseq and histology data  
296 from human IBD patients, which strongly complement our *in vitro* observations, demonstrate that gut  
297 fibrosis is associated with a strong YAP nuclear translocation, loss of ISCs, extension of Olfm4, and  
298 enhanced differentiation towards goblet cells, all of which we have shown to be a direct consequence of  
299 tissue stiffening.

## 300 Discussion

301 We have developed a novel culture of quasi-3D gut organoids plated on top of soft hydrogel matrix.  
302 The resulting *in vitro* cellular collective spontaneously reorganizes into a structure reminiscent of the  
303 crypt-villus anatomy and diverse cell types of native *in vivo* gut epithelium. While the 3D gut organoid  
304 cultured in Matrigel<sup>®</sup> has widely been used as an *in vitro* model of intestinal epithelium, it faces key  
305 limitations. Most notably, its intrinsic configuration does not mimic the *in vivo* anatomy and instead more  
306 closely resembles tumor conditions. Furthermore, the temporal and spatial nutrient and pressure gradients  
307 inside the Matrigel<sup>®</sup>, could directly impact the growth of 3D organoids which underlie a substantial  
308 experimental variability<sup>23</sup>. By contrast, the novel system described here effectively circumvents these



309 limitations and spontaneously generates crypt and villus structures with complex cellular composition  
310 similar to those *in vivo*.

311 Using this system, we observed that increasing matrix stiffness significantly reduced the TA  
312 progenitor cells and Lgr5<sup>high</sup> ISCs, while driving their differentiation preferentially towards goblet cells.  
313 These results were confirmed in colitis mice and IBD patients. It is notable that it was previously reported  
314 that when the 3D gut organoids were embedded inside of the matrix, the matrix stiffening helped maintain  
315 the ISCs and suppressed their differentiation<sup>24</sup>. This discrepancy might be explained by the fact that the  
316 3D organoids more resemble the tumor microenvironment. Additionally, our data show that the increased  
317 expression of nuc-YAP on the stiff matrix caused the reduction of ISCs, which is in-line with the results  
318 using Lats1/2 knockout mice<sup>25</sup>. We also elucidated, for the first time, the divergent roles of cyto-YAP  
319 and nuc-YAP in determining the direction of ISC differentiation. On the soft matrix, cyto-YAP dominates  
320 ISC differentiation into mature enterocytes, while on the stiff matrix, the nuc-YAP drives the  
321 differentiation towards goblet cells, giving rise to the new cell type, IEGC. Our data also have direct  
322 implications for the role of BM stiffening and YAP signaling in the progression of IBD to carcinoma. As  
323 suggested by our observations and the previous studies<sup>26,27</sup>, increasing YAP expression could decrease  
324 the incidence of Lgr5<sup>+</sup> ISCs to form tumor. Nevertheless, the matrix stiffening expanded the expression  
325 of cyto-YAP from crypt-like regions into villus-like regions, which, in turn, expanded the expression of  
326 the oncogenes, Olfm4 and Egfr<sup>28-30</sup>. Moreover, the stiffening led to the formation of new crypts in the  
327 villus-like regions, which could contribute to the uncontrolled regeneration of gut epithelium and the  
328 development of carcinoma.

## 329 **References**

- 330 1 Bloemendaal, A. L., Buchs, N. C., George, B. D. & Guy, R. J. Intestinal stem cells and intestinal  
331 homeostasis in health and in inflammation: a review. *Surgery* **159**, 1237-1248 (2016).
- 332 2 Schmitt, M. *et al.* Paneth cells respond to inflammation and contribute to tissue regeneration by  
333 acquiring stem-like features through SCF/c-Kit signaling. *Cell reports* **24**, 2312-2328. e2317 (2018).
- 334 3 Smillie, C. S. *et al.* Intra-and inter-cellular rewiring of the human colon during ulcerative colitis. *Cell*  
335 **178**, 714-730. e722 (2019).
- 336 4 Scheibe, K. *et al.* Inhibiting interleukin 36 receptor signaling reduces fibrosis in mice with chronic  
337 intestinal inflammation. *Gastroenterology* **156**, 1082-1097. e1011 (2019).
- 338 5 Stewart, D. C. *et al.* Quantitative assessment of intestinal stiffness and associations with fibrosis in  
339 human inflammatory bowel disease. *PloS one* **13** (2018).
- 340 6 Johnson, L. A. *et al.* Matrix stiffness corresponding to strictured bowel induces a fibrogenic response  
341 in human colonic fibroblasts. *Inflammatory bowel diseases* **19**, 891-903 (2013).
- 342 7 Engler, A. J., Sen, S., Sweeney, H. L. & Discher, D. E. Matrix elasticity directs stem cell Lineage  
343 specification. *Cell* **126**, 677-689 (2006).
- 344 8 Mamidi, A. *et al.* Mechanosignalling via integrins directs fate decisions of pancreatic progenitors.  
345 *Nature* **564**, 114-118 (2018).
- 346 9 Segel, M. *et al.* Niche stiffness underlies the ageing of central nervous system progenitor cells. *Nature*  
347 **573**, 130-134 (2019).
- 348 10 Sato, T. *et al.* Paneth cells constitute the niche for Lgr5 stem cells in intestinal crypts. *Nature* **469**, 415-  
349 418 (2011).
- 350 11 Tetteh, P. W. *et al.* Replacement of lost Lgr5-positive stem cells through plasticity of their enterocyte-  
351 lineage daughters. *Cell stem cell* **18**, 203-213 (2016).
- 352 12 Van Es, J. H. *et al.* Dll1+ secretory progenitor cells revert to stem cells upon crypt damage. *Nature*  
353 *cell biology* **14**, 1099-1104 (2012).
- 354 13 Sato, T. *et al.* Single Lgr5 stem cells build crypt-villus structures in vitro without a mesenchymal niche.  
355 *Nature* **459**, 262-265 (2009).

- 356 14 Yilmaz, Ö. H. *et al.* mTORC1 in the Paneth cell niche couples intestinal stem-cell function to calorie  
357 intake. *Nature* **486**, 490-495 (2012).
- 358 15 Dobrokhotov, O., Samsonov, M., Sokabe, M. & Hirata, H. Mechanoregulation and pathology of  
359 YAP/TAZ via Hippo and non-Hippo mechanisms. *Clinical and translational medicine* **7**, 1-14 (2018).
- 360 16 Scaltriti, M. & Baselga, J. The epidermal growth factor receptor pathway: a model for targeted therapy.  
361 *Clinical Cancer Research* **12**, 5268-5272 (2006).
- 362 17 Wang, C. *et al.* Verteporfin inhibits YAP function through up-regulating 14-3-3 $\sigma$  sequestering YAP in  
363 the cytoplasm. *American journal of cancer research* **6**, 27 (2016).
- 364 18 Haber, A. L. *et al.* A single-cell survey of the small intestinal epithelium. *Nature* **551**, 333-339 (2017).
- 365 19 Gregorieff, A., Liu, Y., Inanlou, M. R., Khomchuk, Y. & Wrana, J. L. Yap-dependent reprogramming  
366 of Lgr5+ stem cells drives intestinal regeneration and cancer. *Nature* **526**, 715-718 (2015).
- 367 20 Hong, W. & Guan, K.-L. in *Seminars in cell & developmental biology*. 785-793 (Elsevier).
- 368 21 Clevers, H., Loh, K. M. & Nusse, R. An integral program for tissue renewal and regeneration: Wnt  
369 signaling and stem cell control. *science* **346**, 1248012 (2014).
- 370 22 Yin, X. *et al.* Niche-independent high-purity cultures of Lgr5+ intestinal stem cells and their progeny.  
371 *Nature methods* **11**, 106 (2014).
- 372 23 Shin, W. *et al.* Spatiotemporal gradient and instability of Wnt induce heterogeneous growth and  
373 differentiation of human intestinal organoids. *Iscience* **23**, 101372 (2020).
- 374 24 Gjorevski, N. *et al.* Designer matrices for intestinal stem cell and organoid culture. *Nature* **539**, 560-  
375 564 (2016).
- 376 25 Li, Q. *et al.* Lats1/2 Sustain Intestinal Stem Cells and Wnt Activation through TEAD-Dependent and  
377 Independent Transcription. *Cell Stem Cell* (2020).
- 378 26 Cheung, P. *et al.* Regenerative reprogramming of the intestinal stem cell state via Hippo signaling  
379 suppresses metastatic colorectal cancer. *Cell Stem Cell* **27**, 590-604. e599 (2020).
- 380 27 Barry, E. R. *et al.* Restriction of intestinal stem cell expansion and the regenerative response by YAP.  
381 *Nature* **493**, 106-110 (2013).
- 382 28 Kemper, K. *et al.* Monoclonal antibodies against Lgr5 identify human colorectal cancer stem cells.

383 *Stem cells* **30**, 2378-2386 (2012).

384 29 Van der Flier, L. G., Haegebarth, A., Stange, D. E., Van de Wetering, M. & Clevers, H. OLFM4 is a  
385 robust marker for stem cells in human intestine and marks a subset of colorectal cancer cells.

386 *Gastroenterology* **137**, 15-17 (2009).

387 30 Karapetis, C. S. *et al.* K-ras mutations and benefit from cetuximab in advanced colorectal cancer. *New*  
388 *England Journal of Medicine* **359**, 1757-1765 (2008).

389 31 Barker, N. *et al.* Identification of stem cells in small intestine and colon by marker gene *Lgr5*. *Nature*  
390 **449**, 1003-1007 (2007).

391 32 He, S. *et al.* The tumor suppressor p53 can promote collective cellular migration. *PloS one* **14**,  
392 e0202065 (2019).

393 33 Schlegelmilch, K. *et al.* Yap1 acts downstream of  $\alpha$ -catenin to control epidermal proliferation. *Cell*  
394 **144**, 782-795 (2011).

395

396 **Acknowledgements** This work was supported by funding from National Institutes of Health  
397 (R01DK123219, R01EY028234, and K01DK103947 to N.S., and R01HL148152 and U01CA202123 to  
398 J.J.F.), ECOR/MGH (2019A002949 to N.S.), and Polsky family fund (to N.S.). We thank Dr. Ramnik J.  
399 Xavier, the Director of the Center for the Study of Inflammatory Bowel Disease at Massachusetts General  
400 Hospital (National Institutes of Health, P30DK043351) for his constructive comments, providing human  
401 samples and sharing the human scRNAseq data. We thank Maris A. Handley and Jacqueline Choi from  
402 the HSCI-CRM Flow Cytometry Core and iHisto Inc for their supports.

403

404 **Author Contributions** S.H. and N.S. conceptualized the work and designed the experiments. S.H. and  
405 P.L. performed the experiments with inputs from J.W., P.C., J.O.R. and F.D.C. on generating transgenic  
406 mice, C.Y.P. and J.J.F. for live cell imaging, M.M. and Ö.H.Y. for flow cytometry, E.S. and D.T.B. for  
407 training, and S.I. for in situ hybridization. S.H., H.W. and V.M. performed the DSS mouse model with  
408 inputs from Z.Z. for measuring thickness, and R.W. and Y.Z. for measuring stiffness. W.K., K.S., T.X. and  
409 P.B. performed the scRNAseq analysis for human and organoids with guidance from S.H., R.S. and N.S..  
410 S.H. and N.S. wrote the manuscript. J.J.F., F.D.C., P.C., M.M., C.Y.P., D.T.B., T.X., M.H. and I.A.  
411 commented on the manuscript.

412

413 **The authors declare no competing financial interests.** N.S. and S.H. are inventors on a patent  
414 application filed based on this investigation.

415 **Correspondence** and requests for materials should be addressed to N.S. (nsaeidi@mgh.harvard.edu).

416 **Supplementary Information** is available for this paper.

417

## 418 **Methods**

419 Mice including the strains of wild type C57BL/6J, *Lgr5-EGFP-IRES-CreER*<sup>31</sup>, YAP conditional knockout  
420 and YAP conditional overexpression were used for harvesting crypts. Polyacrylamide hydrogel matrix was  
421 fabricated as described before<sup>32</sup>. The crypts collected from the mouse small intestines were counted and  
422 seeded on the hydrogel matrix. After 11 days culture the cells were fixed for immunofluorescent staining,  
423 or the cells were trypsinized for flow cytometry, the transferring to 3D organoid culture in Matrigel, and  
424 single cell RNA sequencing. The fluorescent signals after staining were quantified using a customized  
425 MATLAB code. Initial processing of scRNA-Seq sequencing data was performed using CellRanger  
426 (v4.0.0). Further analysis was performed using the Seurat and Phenograph. C57BL/6J mice were given 3  
427 cycles of DSS to induce chronic colitis. The mouse colon tissues were collected for immunohistochemistry  
428 and the tissue stiffness was measured using an Instron uniaxial tester. The human samples were provided  
429 by the Prospective Registry in IBD Study at MGH (PRISM).

## 430 **Detailed Methods**

### 431 **Mice**

432 10-14 weeks old mice including the strains of wild type C57BL/6J, *Lgr5-EGFP-IRES-CreER*<sup>31</sup>, YAP  
433 conditional knockout and YAP conditional overexpression were used for harvesting crypts. To generate  
434 the YAP conditional knockout mice, CAG-rtTA3 (Jackson Laboratories) mice were mated with (TetO)7-  
435 Cre (Jackson Laboratory) and *Yap*<sup>fl/fl</sup> mice<sup>33</sup>. To generate the YAP conditional overexpression mice, the  
436 tetO-YAP-GFP mice (Jackson Laboratory, 031279) expressing mutant S112A YAP crossbred with Villin-  
437 rtTA\*M2 mice (Jackson Laboratory, 031285). 1 µg/ml DOX was added to induce YAP knockout or  
438 overexpression in the organoid culture.

## 439 **Preparation of the hydrogel matrix**

440 Polyacrylamide (PA) hydrogel matrix were fabricated on a 35 mm dishes with glass bottom (Cellvis, D35-  
441 20-1.5-N) as described<sup>32</sup>. Briefly, the recipe for different Young's modulus were 3% acrylamide (Bio-Rad,  
442 1610140) and 0.058% bisacrylamide (Bio-Rad, 1610142) for 0.6 kPa, 7.5% acrylamide and 0.034%  
443 bisacrylamide for 2.4 kPa, and 7.5% acrylamide and 0.148% bisacrylamide for 9.6 kPa. 0.1% ammonia  
444 persulfate (sigma, 09913) and 0.05% TEMED (Bio-Rad, 1610800) were added to start the polymerization  
445 process. Then, 70  $\mu$ l gel solution was added into the dishes, and a cover slip of 18 mm in diameter was  
446 placed on the gel solution to flatten the surface and resulted in a gel of 300  $\mu$ m in thickness (VWR, 48380  
447 046). The polymerization required 40 minutes to 1 hour. Then, sulfo-SANPAH (Proteochem, C1111) was  
448 used to activate the gel surface under a 15 W 365 nm UV (VWR, 95-0042-07/36575-050) for 10 minutes.  
449 After the activation, 200  $\mu$ l 0.1 mg/ml type I collagen (Advanced biomatrix, 5022) was added onto the gel  
450 overnight to covalently attach to the gel surface for cell culture.

## 451 **Harvest of crypts**

452 The proximal 12~15 cm small intestines were collected from mice. The intestinal lumen was opened  
453 longitudinally. The mucous was removed using the back of blades. Then, the intestine was washed with  
454 ice cold PBS without calcium and magnesium (Corning, 21-040), and cut into 5 mm ~ 1 cm fragments  
455 and placed into 50 ml conical tubes that were filled with ice-cold 50 ml of PBS/EDTA (10 mM, Thermo  
456 fisher, 15575020). The fragments were incubated and shaken on ice for 40 minutes, and washed with ice-  
457 cold 50 ml of PBS. Then, the fragments were vigorously shaken in 25 ml PBS and filtered twice through  
458 a 70  $\mu$ m mesh (BD Falcon) into a 50 ml conical tube to remove the villi and tissue pieces. The crypts were  
459 mainly in the suspension which were centrifuged for 5 minutes at 100g. The crypt pellet collected here

460 was then ready for seeding on the hydrogel.

## 461 **Culture of Crypts**

462 The crypt pellets were suspended in the seeding media and counted using cytometer to control the crypt  
463 density as 10,000 /ml. 150  $\mu$ l to 200  $\mu$ l crypt suspension was added on to the PA gel in the 35 mm dishes.  
464 After 4 hours, the floating cells/clusters were washed with PBS (Corning, 21-040-cv). 1.5 ml ENR  
465 media/dish was added and changed every other day. To make the ENR media, advanced DMEM/F12  
466 (Gibco, 12634-028) was supplemented with 50 ng/ml EGF (Peprotech, 315-09), 100 ng/ml Noggin  
467 (Peprotech, 250-38), 10% R-spondin conditional media (iLab in Harvard digestive center), 1% Glutamax  
468 (Gibco, 35050-061), 1% HEPES (Gibco, 15630-080), 0.2% Primocin (Invivogen, ant-pm-2), 0.2%  
469 Normocin (Invivogen, ant-nr-2), 1% B27 (Gibco, 12587010), 0.5% N2 (Gibco, 17502-048), and 1.25 mM  
470 N-Acetyl-Cystein (Sigma, A8199). To make the seeding media, the ENR media was supplemented with 3  
471  $\mu$ M Chir-99021 (Selleckchem, S1263) and 10  $\mu$ M Y-27632 (Sigma, Y0503). We captured the phase  
472 images and the GFP images for Lgr5-EGFP fluorescent signal every 20 mins for days using 20X objective  
473 of Leica microscope (Leica DMI8) with a live cell imaging system. Depending on different purposes, 1  
474  $\mu$ g/ml DOX and 1  $\mu$ M VP was, respectively, added to induce YAP KO or OE, or inhibit YAP nuclear  
475 translocation during the culture. After 10-11 days culture, cells were fixed for immunofluorescent staining,  
476 or collected using TrypLE Express (Invitrogen, 12-605-010) for different purposes including flow  
477 cytometry, the transferring to 3D organoid culture in Matrigel, and single cell RNA sequencing.

## 478 **Immunofluorescence (IF), immunohistochemistry (IHC) and In situ hybridization** 479 **(ISH)**

480 For *in vitro* IF, cells were fixed in 4% paraformaldehyde/PBS for 10 minutes and cold 70% ethanol for 30

481 minutes, blocked in 2% BSA for 30 minutes and permeabilized in 0.3% Triton X-100/PBS for 20 minutes.  
482 The cell layers were stained with primary antibody, then stained with secondary antibodies. Laser scanning  
483 microscopy images were captured by using the inverted confocal microscope (Nikon C2, 20X or 60X  
484 objective). The average intensity of the fluorescent signals in these images were then quantified using a  
485 customized MATLAB code which can identify the crypt-like regions based on the nuclei density  
486 (Extended Data Fig. 26). All the fluorescent images represented at least nine field views from three  
487 different animal (3 field views/animal). Student's *t*-test was used to determine statistical significance with  
488 a cut-off of  $P < 0.05$ . *In vivo* IHC and IF was performed by iHisto Inc. Samples were processed, embedded  
489 in paraffin, and sectioned at 4  $\mu\text{m}$ . Paraffin sections were then deparaffinized and hydrated. Antigen  
490 retrieval was achieved by boiling the sections in 10 mM sodium citrate. Sections were then washed with  
491 PBS three times, treated with 3%  $\text{H}_2\text{O}_2$  for 15 min and 5% bovine serum albumin for 20 minutes. The  
492 sections were incubated with primary antibodies overnight at 4  $^\circ\text{C}$ . Subsequently, the sections were  
493 immunohistochemically stained with secondary antibodies for 50 min at room temperature. Rabbit  
494 primary antibodies were used for staining Villin (ab130751), Muc2 (ab76774, ab272692), Chromogranin-  
495 A (ab15160), Lysozyme (ab2408), non-phosphorylated YAP (ab205270), Trefoil Factor 3 (ab272927) and  
496 Egfr (ab40815), Ki-67 (cs9129), Olfm4 (ab105861, cs14369), Ser127 Phospho-YAP (cs13008), collagen  
497 I (ab34710) and collagen IV (ab6586). Mouse primary antibodies were used for total YAP (ab56701) and  
498 Villin (Proteintech, 66096-1-Ig). Goat anti rabbit/mouse Alexa Fluor 405, 488, 594 and 647 (Thermo fisher)  
499 were used as secondary antibodies. DAPI (Fisher scientific, D1306) and UEA-1 Fluorescein (Vector labs,  
500 FL-1061-5) were respectively used for staining nuclei and Paneth cells. Single-molecule in situ  
501 hybridization was performed using Advanced Cell Diagnostics (ACD) RNAscope 2.0 HD Detection Kit



502 (Fast Red dye) for the probes of Lgr5 (ACD, 311021) and Olfm4 (ACD, 311041).

### 503 **Flow cytometry**

504 The cells on the PA hydrogel were trypsinized using TrypLE for 10 minutes at 37°C. After collecting the  
505 cells, cold SMEM (1:5) was added to stop the trypsinization, and followed by centrifuging for 5 min at  
506 300 g. The cell pellets were re-suspended and stained for 15 min on ice in 1ml antibody cocktail. To make  
507 the antibody cocktail, SMEM (Sigma, M8167) was supplemented by CD45-PE (1:500, eBioscience, 30-  
508 F11), CD31-PE (1:500, Biolegend, Mec13.3), Ter119-PE (1:500, Biolegend, Ter119), CD24-Pacific Blue  
509 (1:300, Biolegend, M1/69), EPCAM-APC (1:300, eBioscience, G8.8) and CD117(C-kit)-APC-CY7  
510 (1:300, Thermo fisher, 47-1171-80) . After the staining 10ml SMEM were added and the samples were  
511 centrifuged for 5 min at 300 g. The pellets were resuspended with 1 ml SMEM supplemented by 7-AAD  
512 (1:500, Thermo fisher A1310), and filtered through a 40µm mesh (BD Falcon) before cell sorting with a  
513 BD FACS Aria II cell sorter. ISCs were isolated as Lgr5-EGFP<sup>high</sup>Epcam<sup>+</sup> CD24<sup>low/-</sup> CD31<sup>-</sup> Ter119<sup>-</sup>  
514 CD45<sup>-</sup> and 7-AAD<sup>-</sup>, TA progenitors were isolated as Lgr5-EGFP<sup>low</sup> Epcam<sup>+</sup> CD24<sup>low/-</sup> CD31<sup>-</sup> Ter119<sup>-</sup>  
515 CD45<sup>-</sup> and 7-AAD<sup>-</sup>, Paneth cells were isolated as CD24<sup>high</sup> Sidescatter<sup>high</sup> C-kit<sup>+</sup> Lgr5-EGFP<sup>-</sup> Epcam<sup>+</sup>  
516 CD31<sup>-</sup> Ter119<sup>-</sup> CD45<sup>-</sup> and 7-AAD<sup>-</sup>.

### 517 **Culture of 3D organoids in Matrigel transferred from the 2D hydrogel**

518 The cells on the hydrogel matrix were trypsinized using TrypLE for 5 minutes at 37°C. The wells were  
519 sealed with lid, and the bottom of the wells were vigorously hit onto the table to detach the cells. After  
520 collecting the cells/clusters cold SMEM (1:5) was added to stop the trypsinization, and followed by  
521 centrifuging for 5 min at 300 g. The cell pellets were resuspended in ENR media and Matrigel (1:1,  
522 Corning 356231), then seeded 25 µl/well in a 48-well plates and put at 37°C for solidification. After 20

523 minutes, 150  $\mu$ l/well ENR media was added, and changed every 3 days. The 3D organoids were imaged  
524 on day 5.

### 525 **Single cell RNA sequencing for the gut organoids**

526 The scRNA-seq library construction was performed on the Chromium 10x instrument using Chromium  
527 single cell 3' reagent v3.0 kits, followed by sequencing on Illumina HiSeq 2500 instruments, which  
528 resulted in approximately 160 million reads per sample. Initial processing of scRNA-Seq sequencing data  
529 was performed using CellRanger (v4.0.0)

530 (<https://support.10xgenomics.com/single-cell-gene-expression/software/overview/welcome>). In brief,  
531 reads were aligned to mm10 mouse reference genome with the mapping rate of ~70%, followed by the  
532 generation of read counts per gene in each cell. Further analysis was performed using the Seurat 3.2.3  
533 package (<https://satijalab.org/seurat/>). We filtered out cells with <200 expressed genes and genes  
534 expressed in <3 cells, followed by the exclusion of cells with high content of mitochondrial transcripts (>  
535 20% of total reads). Counts across all cells for each sample were normalized using NormalizeData function  
536 and the effect of the cell cycle was removed by regressing the difference out between the S phase and  
537 G2M phase from normalized data. Using the FindVariableFeatures function we selected 2000 features to  
538 be used in a Principal Component Analysis (PCA). UMAP dimensionality reduction and cell clustering  
539 were performed using RunUMAP and FindClusters functions, respectively. VlnPlot and FeaturePlot  
540 functions were used to generate violin plots and feature plots for the datasets. Heatmaps of gene expression  
541 were generated using DoHeatmap function. Cells from all samples were then integrated using Seurat  
542 canonical correlation analysis (CCA) method. Integration anchors were obtained  
543 using the FindIntegrationAnchors function and used to integrate individual datasets with IntegrateData

544 function. Biological annotation of cell clusters was based on the expression of known cell type markers.  
545 For the differential expression analysis, FindMarkers function was applied to the integrated samples in  
546 order to identify differentially expressed genes between the cell subsets.

## 547 **Single cell RNA sequencing for human colon epithelium**

### 548 **Cell clustering and differential expression analysis**

549 We re-analyzed scRNAseq data of colon biopsy specimen generated by Smilie et al <sup>3</sup> (raw data from  
550 [https://portals.broadinstitute.org/single\\_cell/study/SCP259](https://portals.broadinstitute.org/single_cell/study/SCP259)). From the dataset, we used epithelial samples  
551 containing healthy tissue and inflamed tissue samples from patients with ulcerative colitis. We followed  
552 the same procedure to identify cell clusters as outlined in Smilie et al using  
553 Seurat(<https://satijalab.org/seurat/>, v.3.2.3) and Phenograph. The only exception being a larger k=1000  
554 was used when applying Phenograph to KNN-graphs, and then re-clustering with k=50 is used to identify  
555 rare epithelial cell types. Cell clusters were identified by gene expression with known cell type markers.  
556 Barnes-Hut t-Distributed Neighbor Embedding on PCS (perplexity=10, iterations=5000) provided  
557 visualization of data embedding. The coarser k resulted in larger cell clusters where immature forms of  
558 cell types are no longer differentiated from the terminally differentiated cell types. The MAST model is  
559 fit to identify cell type markers and DE genes in inflamed tissue samples with control tissue, discrete  
560 coefficient of MAST model output is reported in text and figures unless otherwise stated.

### 561 **Identifying statistically significant differences in cell proportions**

562 As samples with exceedingly small number of cells show few cell types and disproportionate cell type  
563 proportions, we excluded samples containing less than 250 cells from subsequent analysis. Then changes  
564 in cell proportion between healthy and inflamed tissue are assessed by two methods. We first used monte-  
565 carlo test, where H0 is differences in proportions for each cell type between inflamed and healthy condition  
566 is a consequence of random sampling. We combined cells from both conditions together, and then  
567 randomly segregated cells back into the two conditions while maintaining original sample sizes and  
568 repeated the process 1000 times. We recalculated the proportion difference between the two conditions  
569 and compare to observed proportional difference for each cell type, and the *P*-value reflect number of

570 simulations where simulated proportional difference was more than observed. This test reflects how  
571 enriched each cell type is within each condition (healthy or inflamed), but does not account for the  
572 specimen from which each cell is isolated. In the second method, we calculated the relative variation in  
573 each cell type proportion between all pairs of healthy donors as a control. Then, we calculated the relative  
574 variation in each cell type by dividing the fraction of the cell type in each inflamed specimen by that of a  
575 healthy specimen. After  $\log_2$  transformation, we conducted a two-sided Kolmogorov-Smirnov (KS) test  
576 of the relative variation in composition between the control (healthy) and inflamed groups (ks.test  
577 function).

### 578 **Identifying significant changes in pathway gene signatures**

579 The ECM pathway (YAP1ECM\_AXIS) was obtained from WikiPathways and WNT signaling pathway is  
580 obtained from KEGG. The gene signature of top 200 YAP-upregulated genes were curated by Gregorieff  
581 et al <sup>19</sup>. Pathway enrichment analysis (PEA) were performed using gene sets from these pathways with the  
582 fgsea package in R , and the shared genes between significant cell types are used as the gene signatures  
583 for the pathways of interest. Expression of each gene was then scaled by its root mean squared expression  
584 across all cells, and mean scaled expression for all signature genes in the pathway is calculated to give a  
585 signature score for each cell. Then, we used mixed linear models to identify changes in expression levels  
586 of gene signatures in the inflamed state. In the model, the fixed effect term is used to represent the  
587 condition of each cell (healthy or inflamed) and the random intercept that varies with each sample is used  
588 to account for the sample each cell was isolated from. ANOVA is used to estimate the fixed term *P*-value.

### 589 **Chronic Colitis mouse model induced by DSS and samples from IBD patients**

590 To induce chronic colitis, Wild type 8-weeks old C57BL/6J mice were given 3 cycles of DSS. Each cycle  
591 included 2.5% DSS in drinking water for 7 days and distilled water for the following 14 days. After the  
592 third cycle of giving DSS verteporfin (VP, 25 mg/kg/d in DMSO; Sigma-Aldrich) or vehicle as control  
593 was administered via i.p. injection for 14 days. Then colon tissues were collected for measuring stiffness  
594 and immunohistochemistry (IHC). Antibodies were used same as in IF. ID of human patients for the  
595 healthy, inflamed, and strictured gut samples are, respectively, 109922, 117324, and 110201. Protocol No.  
596 for involving human subjects is 2004P001067 reviewed by IRB.

## 597 **Uniaxial tensile testing for colon stiffness measurement**

598 The colons collected from the chronic colitis experiments were cut open along the longitudinal direction  
599 into flat rectangular patches using a surgical scalpel. Sandpaper tabs were glued to both ends of a sample  
600 to prevent slipping during testing. The effective length ( $l_0$ , i.e., sandpaper-to-sandpaper distance) and  
601 width ( $w$ ) of each sample were measured using a caliper. The section view of the colons supported with a  
602 10ul tips was imaged, and the thickness ( $t$ ) of the section was measured using Image-J. Samples were  
603 mounted on an Instron uniaxial tester (Instron, Norwood, MA) by clamping the sandpaper tabs with the  
604 grips attached to the tester (Extended Data Fig. 27). Samples were moisturized with PBS spray before a  
605 test started. Steady-state uniaxial tensile tests were performed by fixing one end of the sample and pulling  
606 away the other end with an extension rate of 0.02 mm/s. The pulling force ( $F$ ) and the displacement ( $d$ )  
607 of the moving end of the sample were recorded at a frequency of 5 Hz. The end of the regime of elastic  
608 deformation was marked by a drop in the slope of the force-displacement curve. The stain ( $\varepsilon$ ) of the sample  
609 was obtained as

$$610 \quad \varepsilon = \frac{d}{l_0}$$

611 Assuming tissue incompressibility, the Cauchy stress ( $\sigma$ ) can be calculated as

$$612 \quad \sigma = \frac{F}{wt} (1 + \varepsilon)$$

613

614 **Extended Data**

615

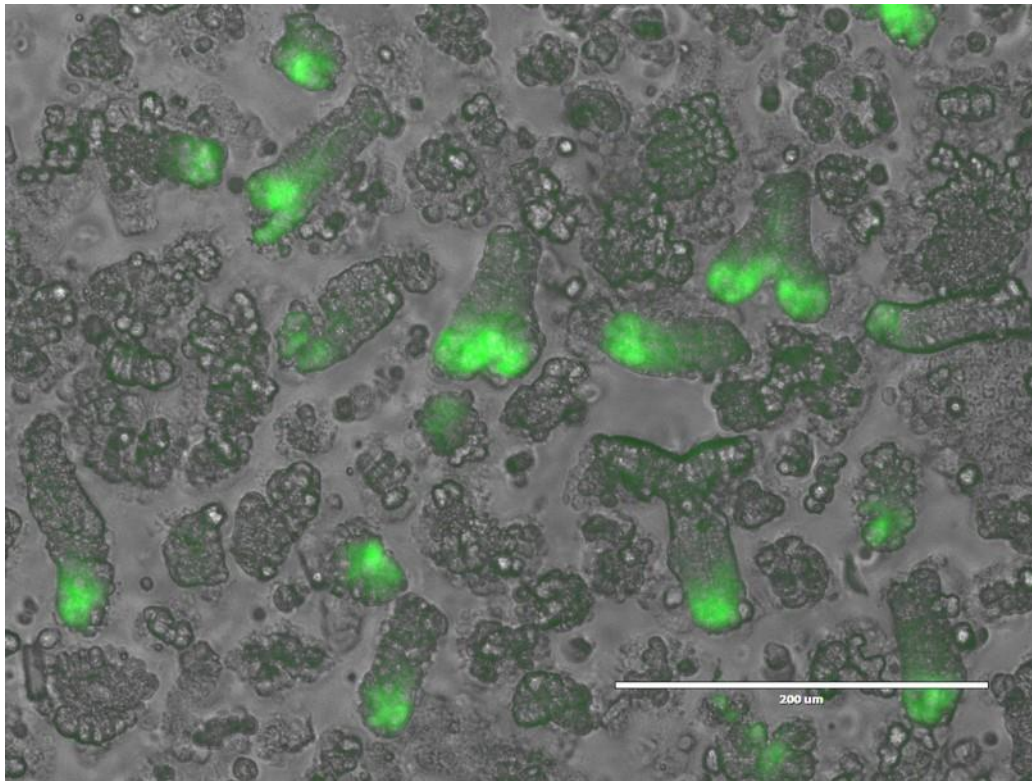

616

617 **Extended Data Figure 1.** The crypts with Lgr5-EGFP<sup>+</sup> ISCs were harvested from *Lgr5-EGFPires-creERT2* mice, and seeded on the hydrogel matrix.

619

620

621

622

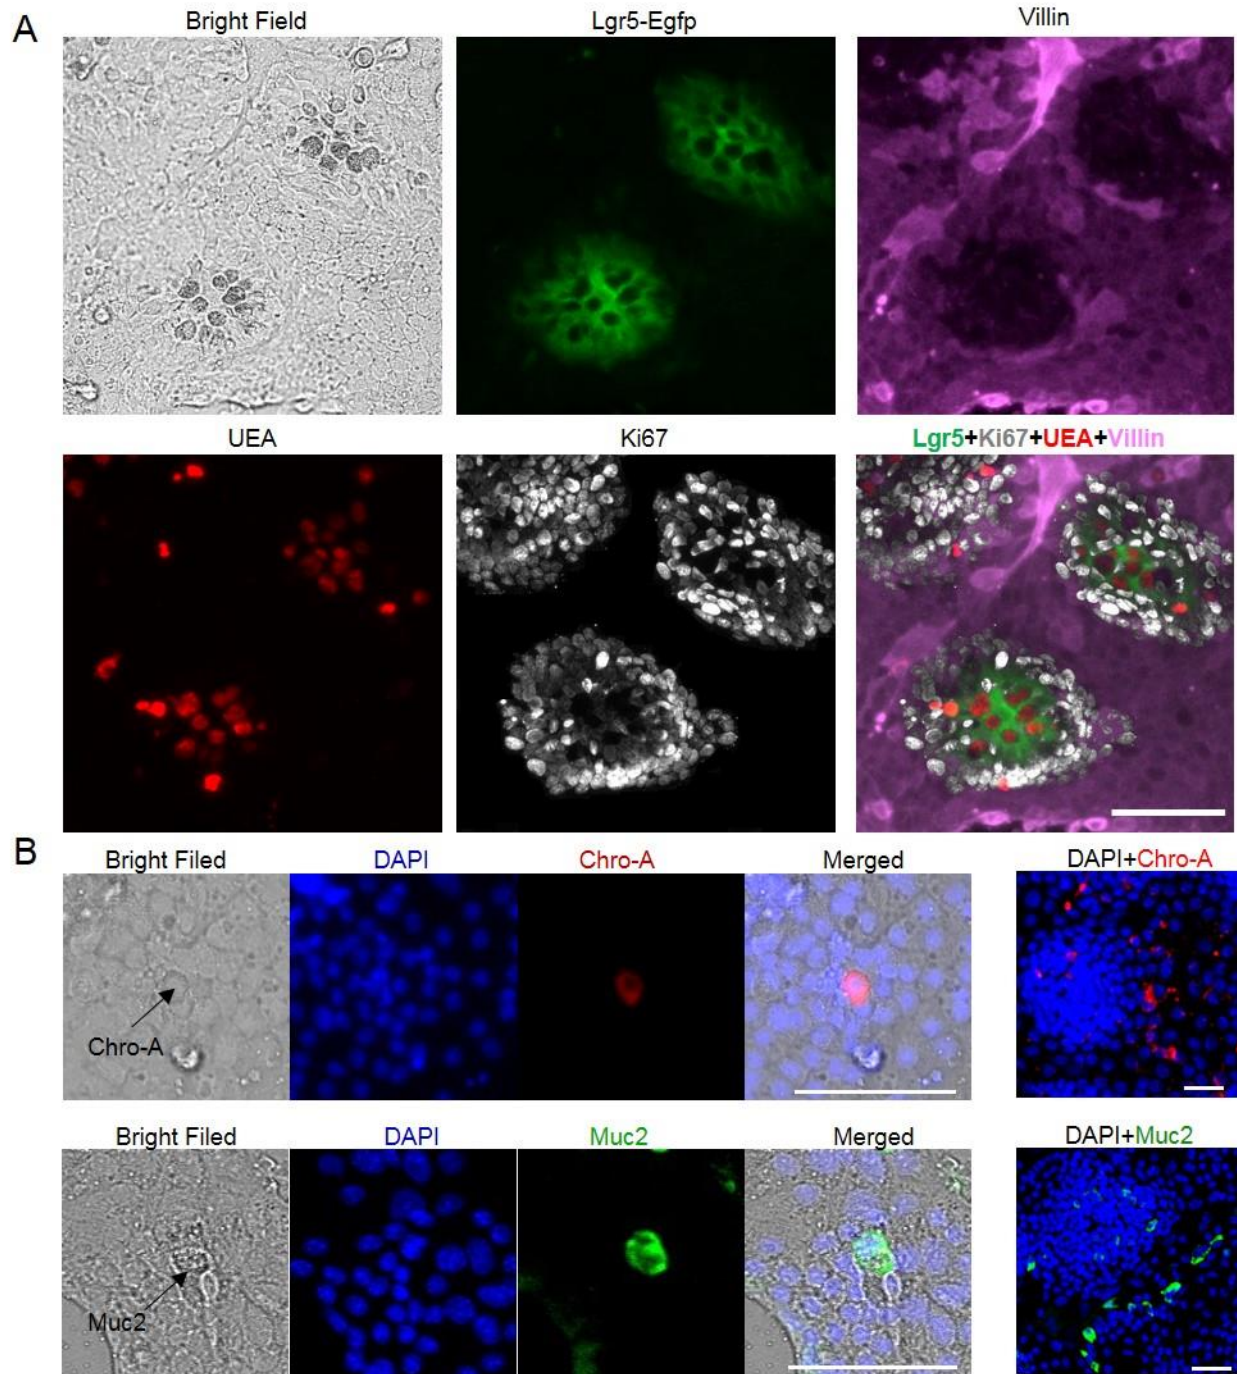

623

624 **Extended Data Figure 2.** (A) Lgr5-EGFP<sup>+</sup> ISC were intermixed with the optically dark UEA<sup>+</sup> Paneth  
625 cells, which were surrounded by Ki67<sup>+</sup> TA cells in the crypt-like regions. Lgr5-EGFP<sup>high</sup> ISCs weakly  
626 expressed Ki67. The villus-like regions were populated by Villin<sup>+</sup> enterocytes. (B) Chro-A<sup>+</sup> EEC and  
627 Muc2<sup>+</sup> goblet cells were presented in the villus-like regions. *n*=3. Scale bar, 100  $\mu$ m.

628

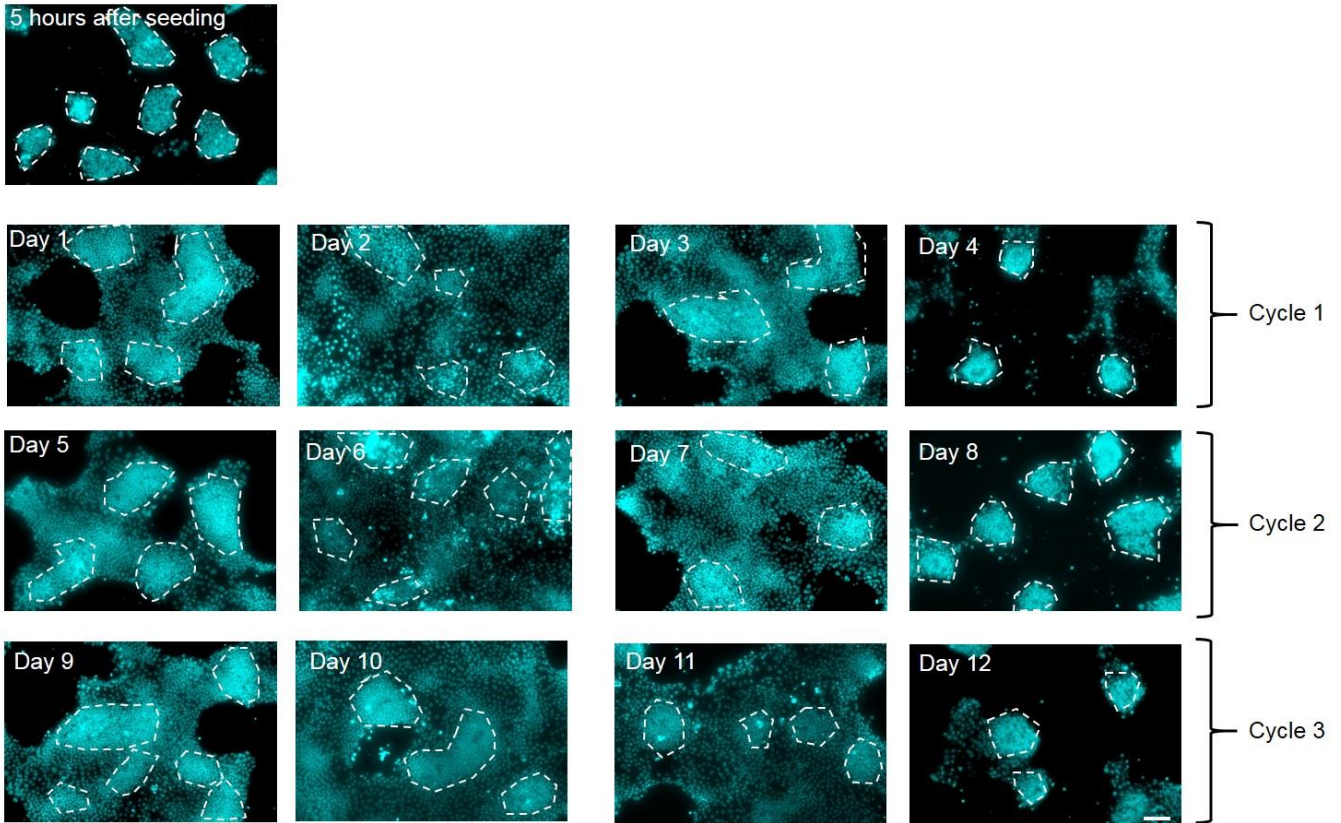

629

630

631

632

**Extended Data Figure 3.** The villus-like regions exhibited a turnover rate of approximately 3 days ( $n=5$ ). The white dashed lines trace the crypt-like regions. Scale bar, 100  $\mu\text{m}$ .



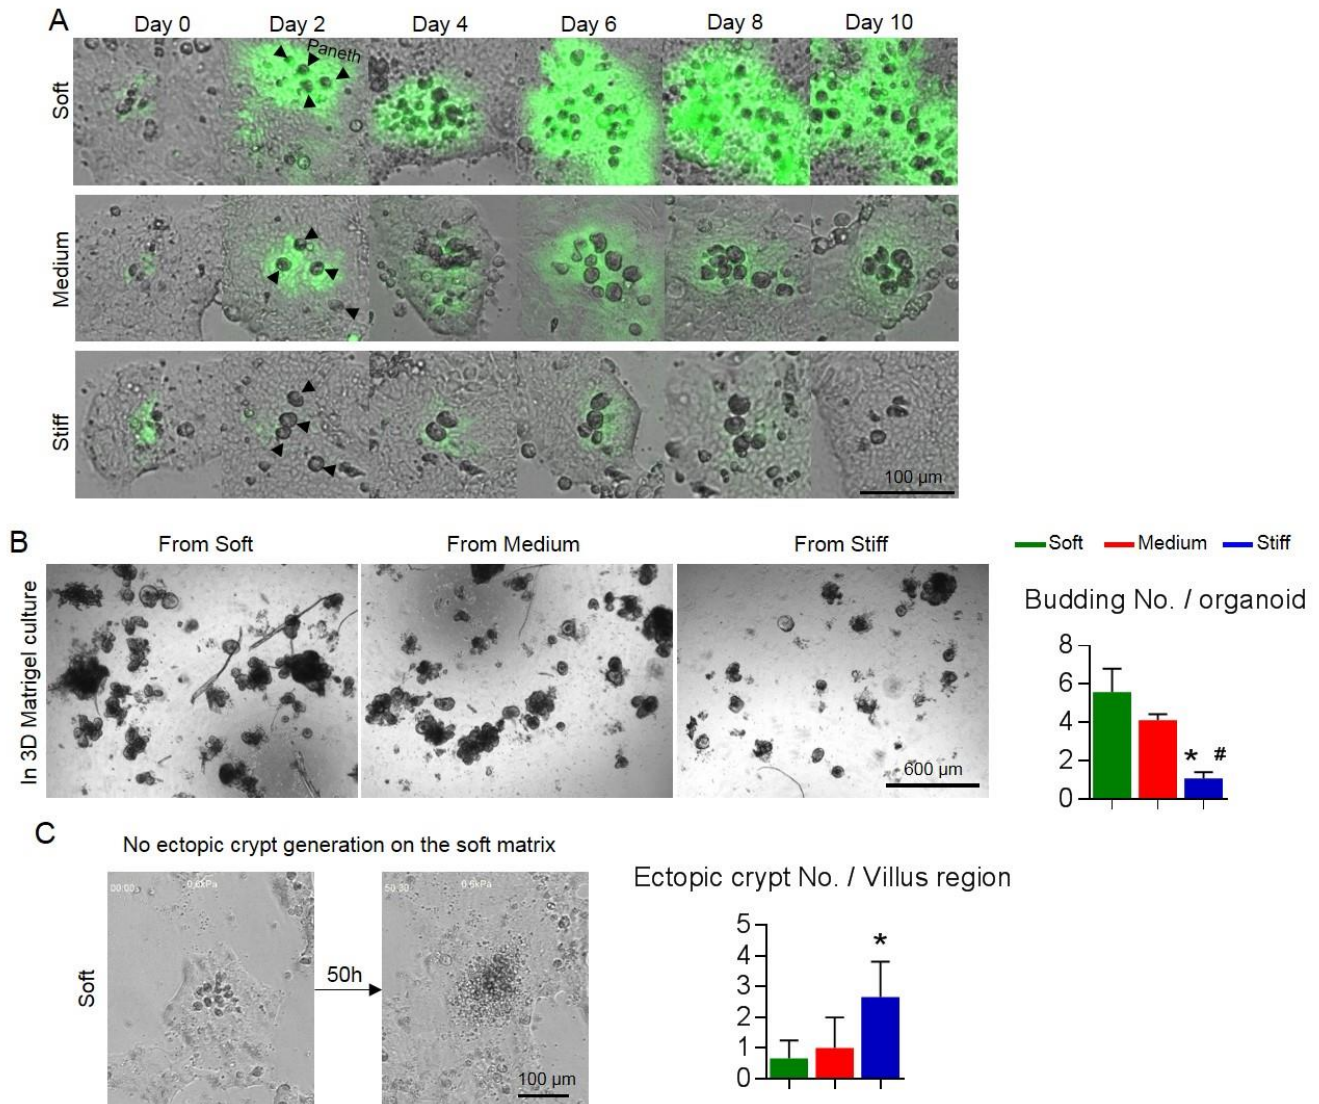

633

634

635

636

637

638

639

640

641

642

**Extended Data Figure 4.** (A) Long-term live-cell imaging exhibited completely different phenotype of  $Lgr5-EGFP^+$  ISCs between the soft matrix and the stiff matrix. More specifically, on the soft matrix, the  $Lgr5-EGFP^+$  ISCs continuously increased and expanded throughout the culture period. In contrast,  $Lgr5-EGFP^+$  ISCs on the stiff matrix progressively diminished over time, nearly disappearing by the 10<sup>th</sup> day. The medium matrix was able to maintain some  $Lgr5-EGFP^+$  ISCs. (B) The 3D organoids from the soft or medium matrix budded, but those from the stiff matrix grew as cysts with less budding ( $n=3$ ). (C) New crypt generation in the villus-like regions appeared more on the stiff matrix than on the soft matrix (Movies S2 and S3,  $n=3$ ). \* V.S. Soft and # V.S. Medium,  $P<0.05$ .

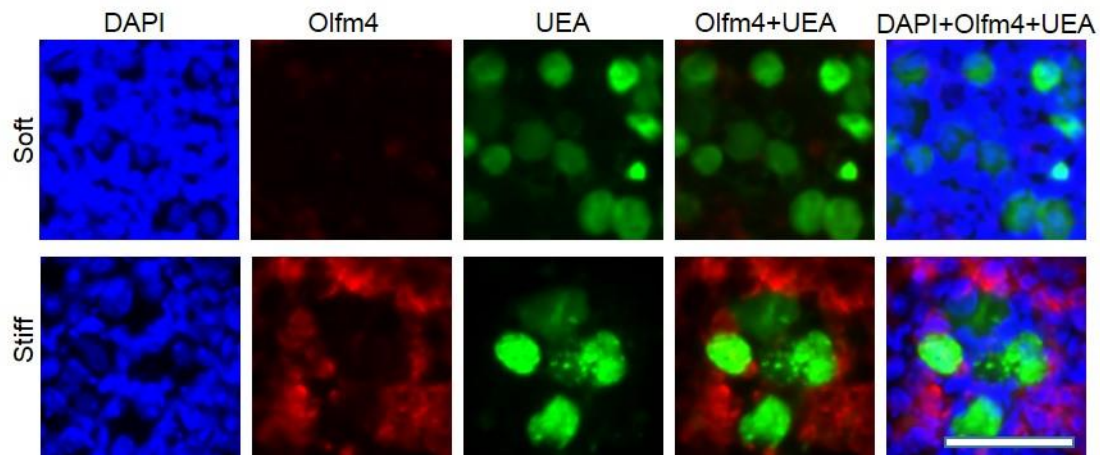

643

644 **Extended Data Figure 5.** In the interior of the crypt-like regions, Olfm4<sup>+</sup> cells became adjacent with

645 UEA<sup>+</sup> Paneth cells on the stiff matrix ( $n=3$ ). Scale bar, 50  $\mu\text{m}$

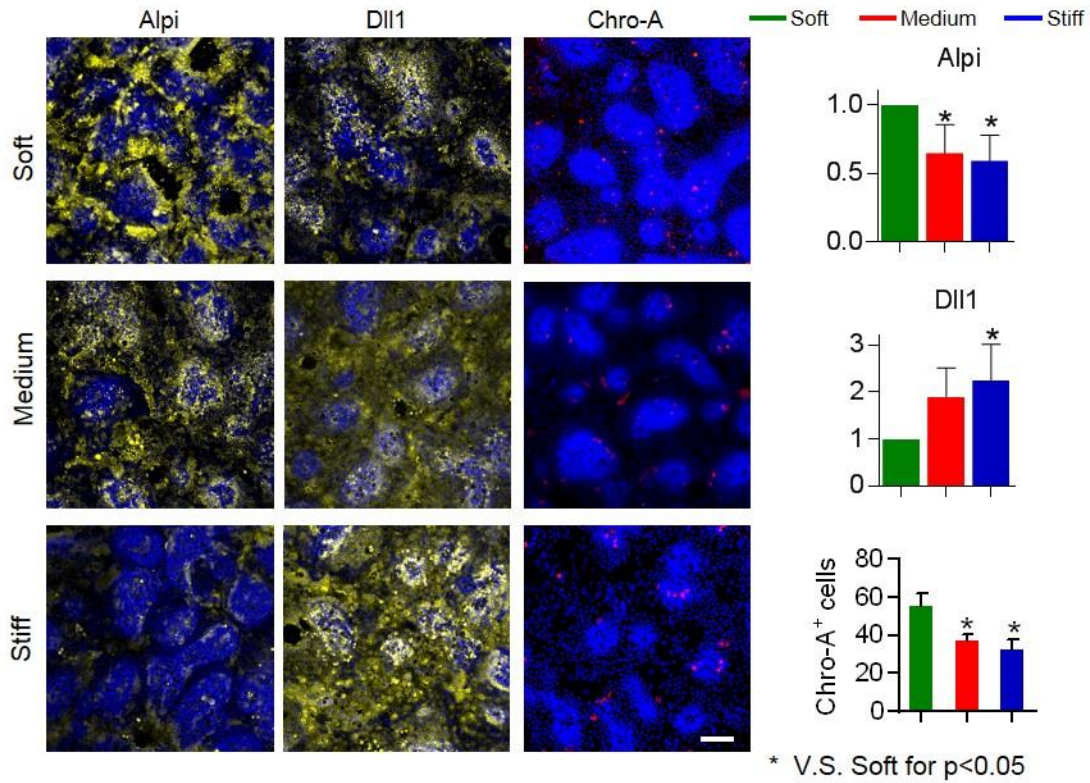

646

647 **Extended Data Figure 6.** The stiffening decreased Alpi and Chro-A, and increased Dll1 ( $n=3$ ). Scale  
648 bar, 100  $\mu\text{m}$ .

649

650

651

652

653

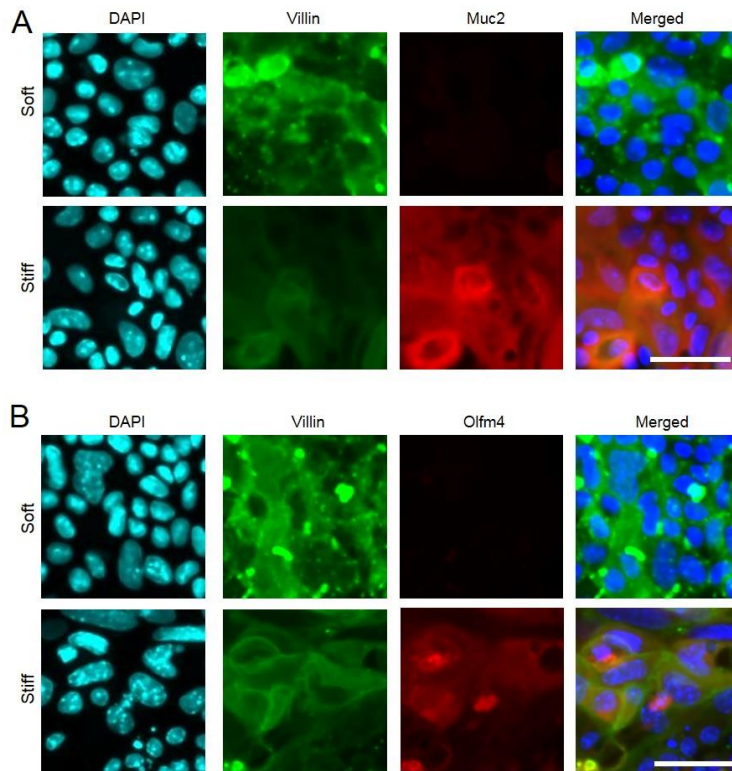

654

655 **Extended Data Figure 7.** Counterstaining in the villus-like regions for Villin and Muc2 (A), and Villin  
656 and Olfm4 (B).  $n=3$ . Scale bar, 50  $\mu\text{m}$ .

657

658

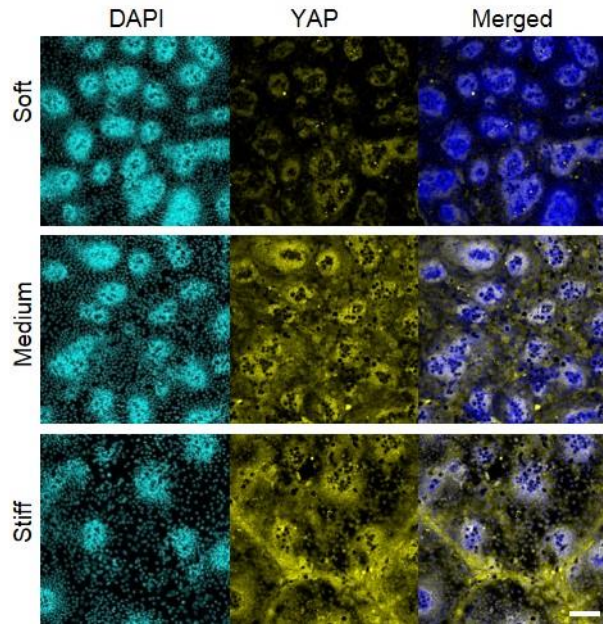

659

660 **Extended Data Figure 8.** Stiffening increased YAP expression and promoted YAP nuclear translocation  
661 on the stiff matrix ( $n=5$ ). Scale bar, 100  $\mu\text{m}$ .

662

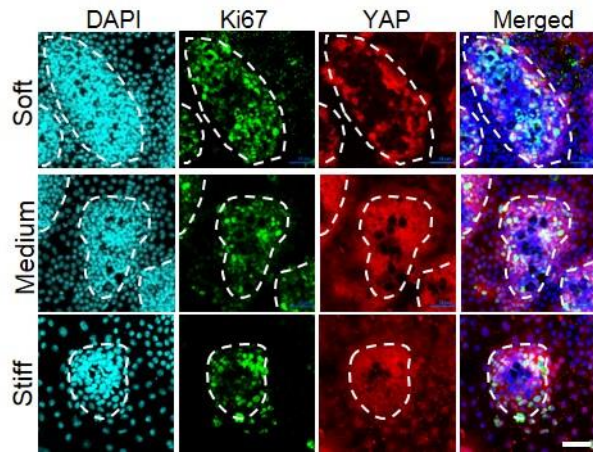

663

664

665

666

667

668

**Extended Data Figure 9.** Ki67 was positively correlated with cyto-YAP ( $n=3$ ). The white dashed lines trace the crypt-like regions. Scale bar, 25  $\mu\text{m}$ .

669

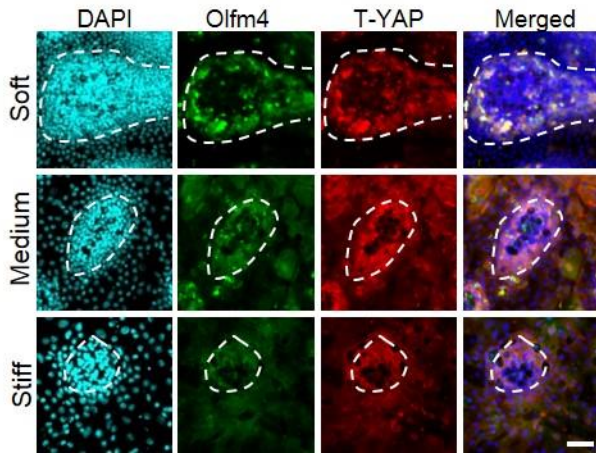

670

671 **Extended Data Figure 10.** Olfm4 was positively correlated with cyto-YAP ( $n=3$ ). The white dashed lines  
672 trace the crypt-like regions. Scale bar, 25  $\mu\text{m}$ .

673

674

675

676

677

678

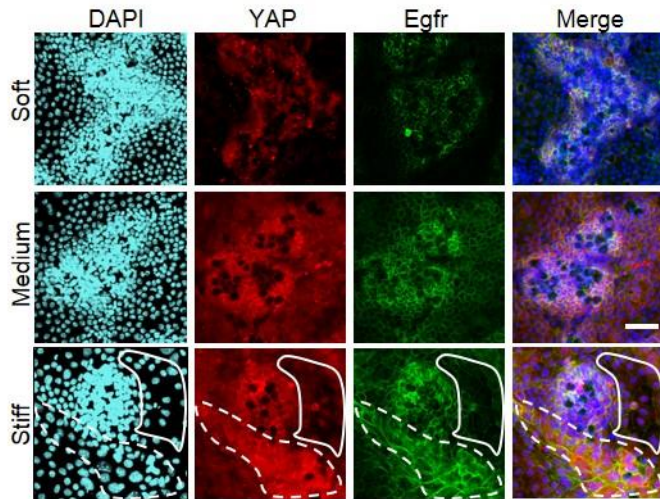

679

680 **Extended Data Figure 11.** Egfr was positively correlated with cyto-YAP ( $n=3$ ). On the stiff matrix, the  
681 white dashed line traces the region with high expression of cyto-YAP, and the solid line traces the region  
682 with YAP nuclear localization. Scale bar, 25  $\mu$ m.

683



684

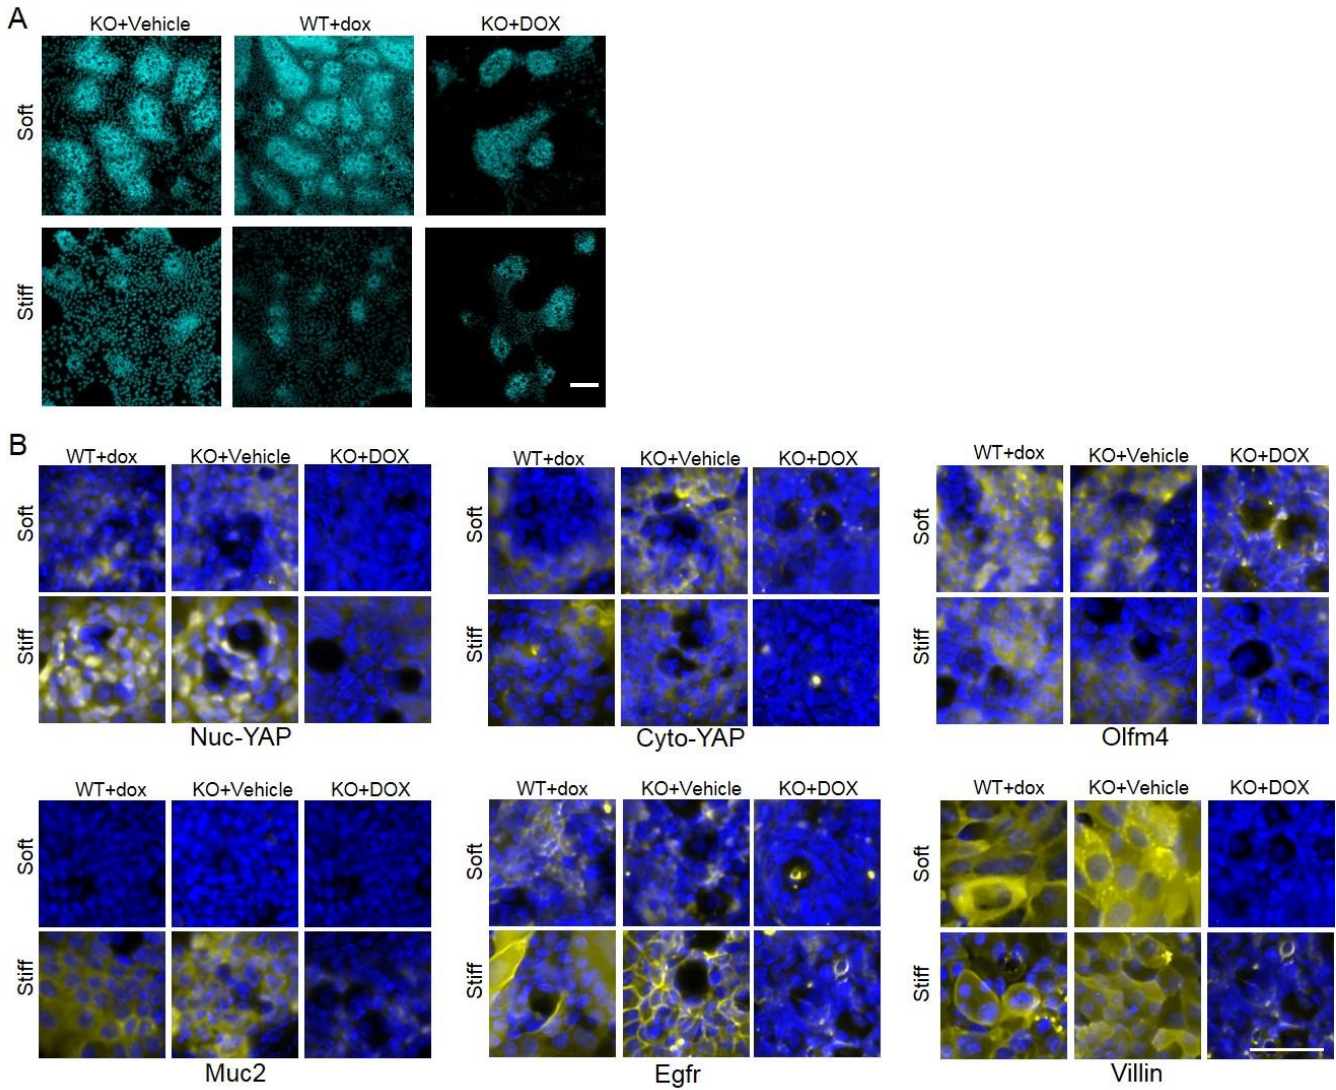

685

686

687

688

689

690

691

**Extended Data Figure 12.** Staining for WT+DOX, YAP KO+Vehicle, and YAP KO+DOX on both soft and stiff matrix. (A) YAP KO by DOX led to the loss of the villus-like regions. Scale bar, 100  $\mu\text{m}$ . (B) The leftover crypt-like regions were enriched with Paneth cells and were negative for nuc-YAP and Muc2, as well as cyto-YAP, Olfm4, Villin and Egfr.  $n=3$ . Scale bar, 25  $\mu\text{m}$ .

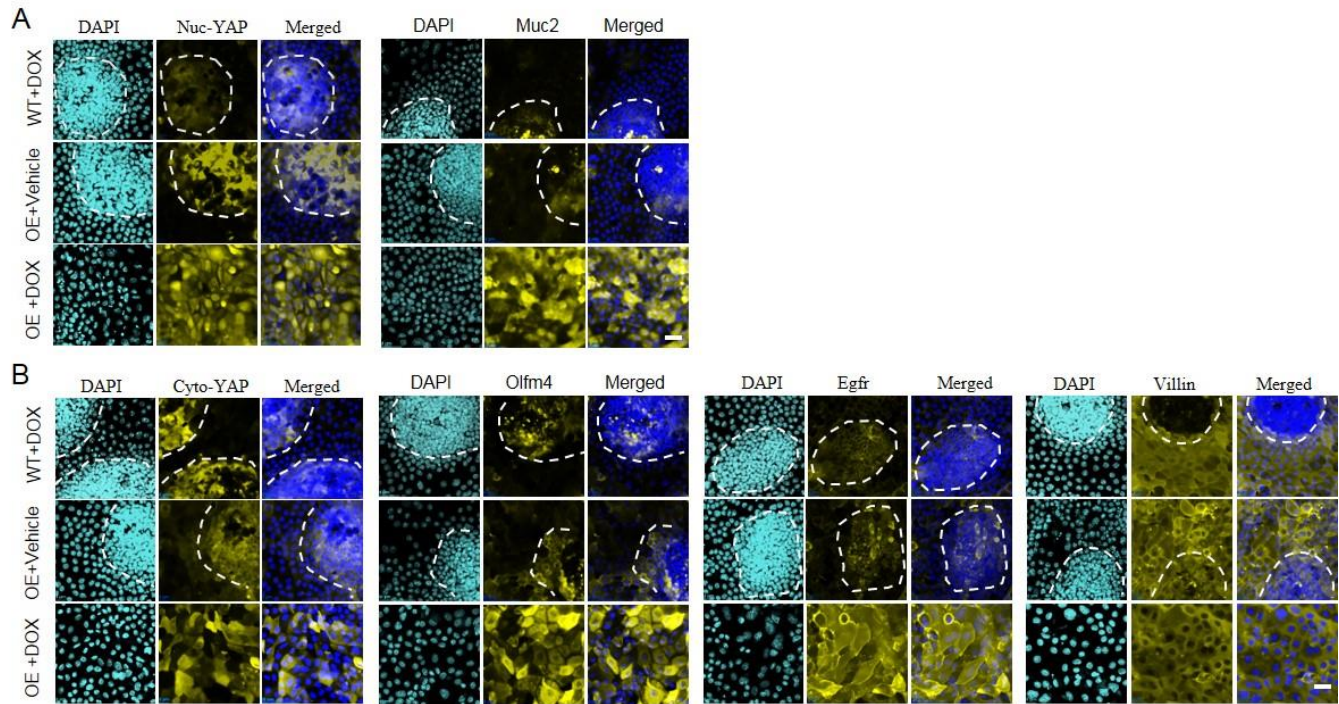

692

693 **Extended Data Figure 13.** Staining for WT+DOX, YAP OE+Vehicle, and YAP OE+DOX. (A) Increasing  
694 nuc-YAP expression by OE promoted Muc2. (B) The increase in cyto-YAP augmented the expression of  
695 Olfm4 and Egfr. The white dashed lines trace the crypt-like regions.  $n=3$ . Scale bar, 25  $\mu\text{m}$ .

696

697

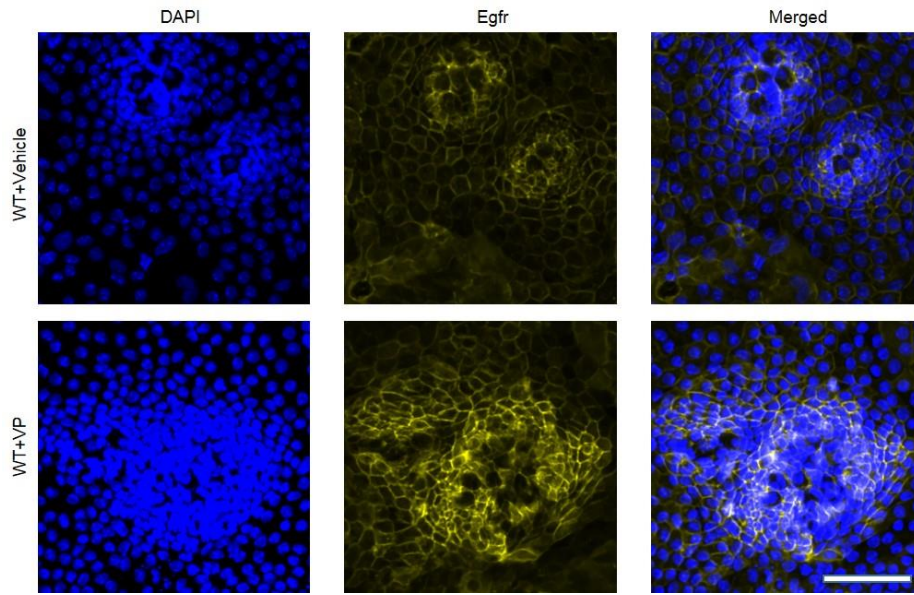

698

699 **Extended Data Figure 14.** Staining for WT+Vehicle and WT+VP. VP augmented the expression of  
700 Egfr.  $n=3$ . Scale bar, 50  $\mu\text{m}$ .

701

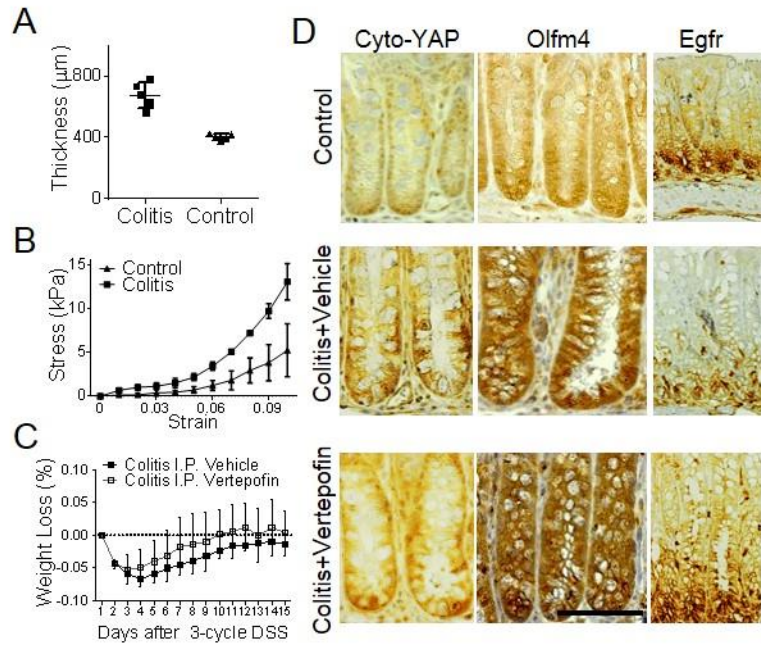

702

703 **Extended Data Figure 15.** Colon thickened (A,  $n=6$ ) and stiffened (B,  $n=3$ ) in colitis group compared to  
704 the control. (C) VP treatment mitigated the body weight loss of the colitis group ( $n=6$ ). (D) Cyto-YAP and  
705 Olfm4 were lower in control than the other two groups. VP treatment significantly increased the  
706 expression of Egfr. Scale bar, 200  $\mu\text{m}$ .

707

708

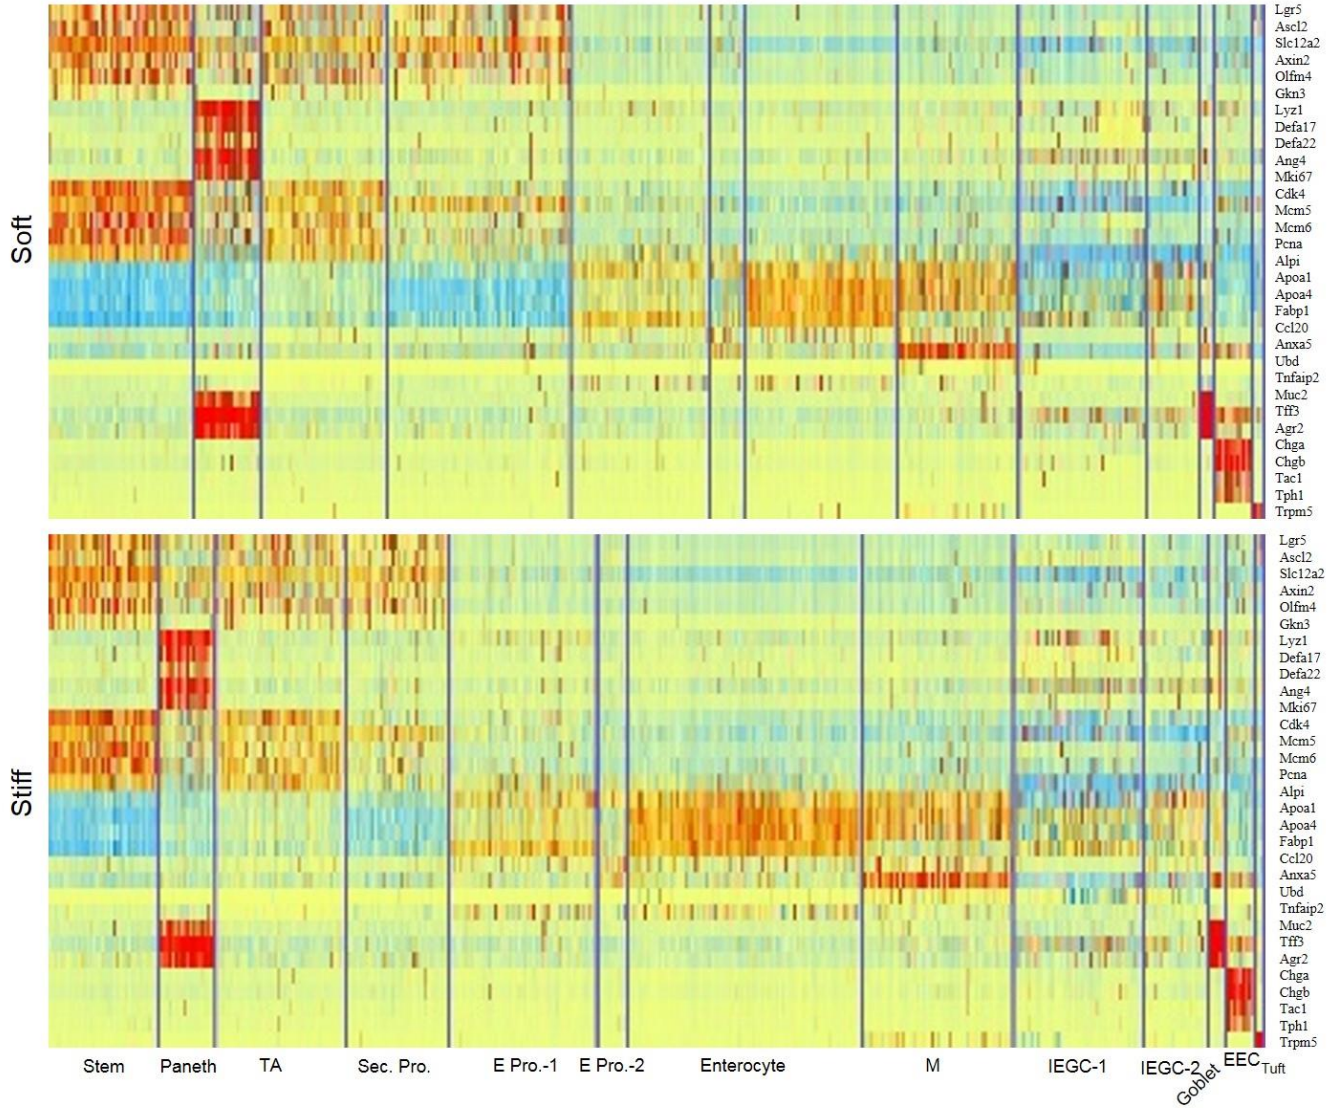

709

710 **Extended Data Figure 16.** Full labels of marker genes for each cell type.

711

712

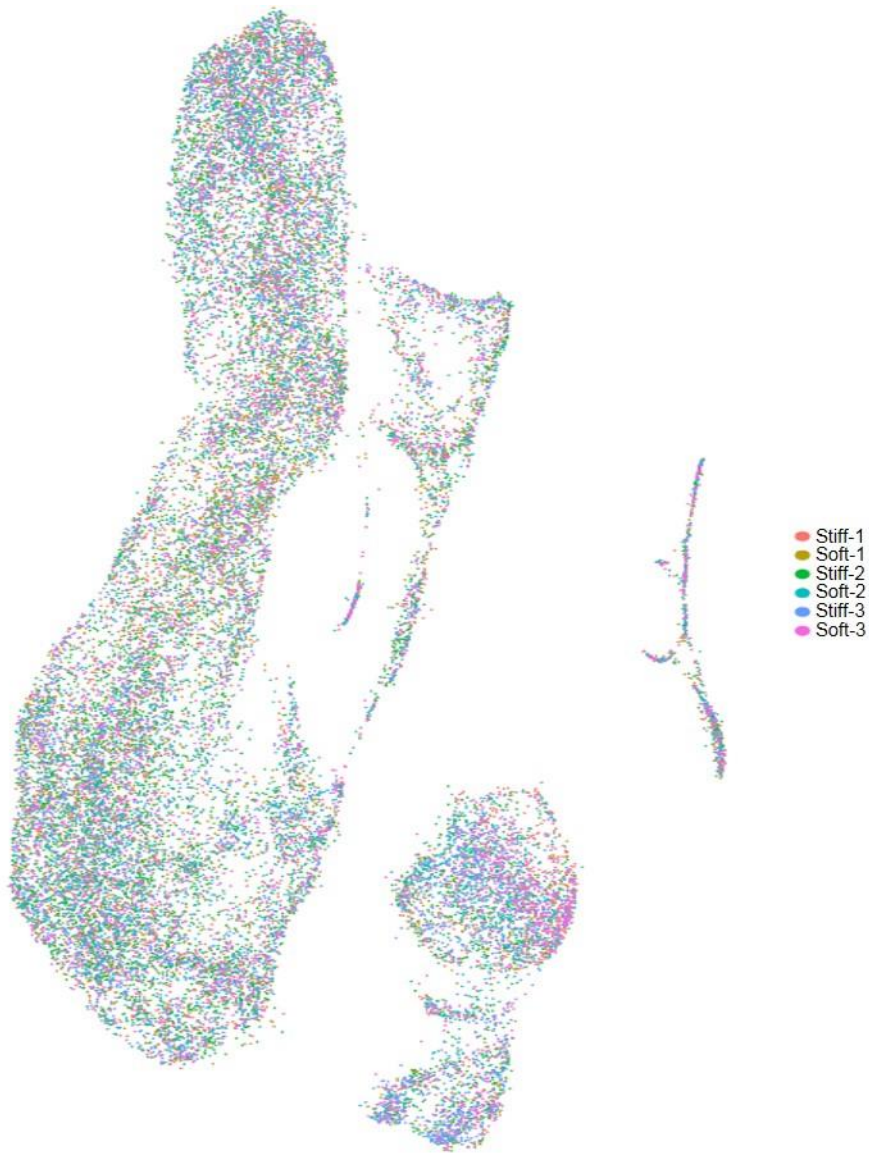

713

714 **Extended Data Figure 17.** Three animals were used to triplicate the single-cell expression profiles. The  
715 clustering was consistent among the triplication on both the soft matrix and the stiff matrix.

716

717

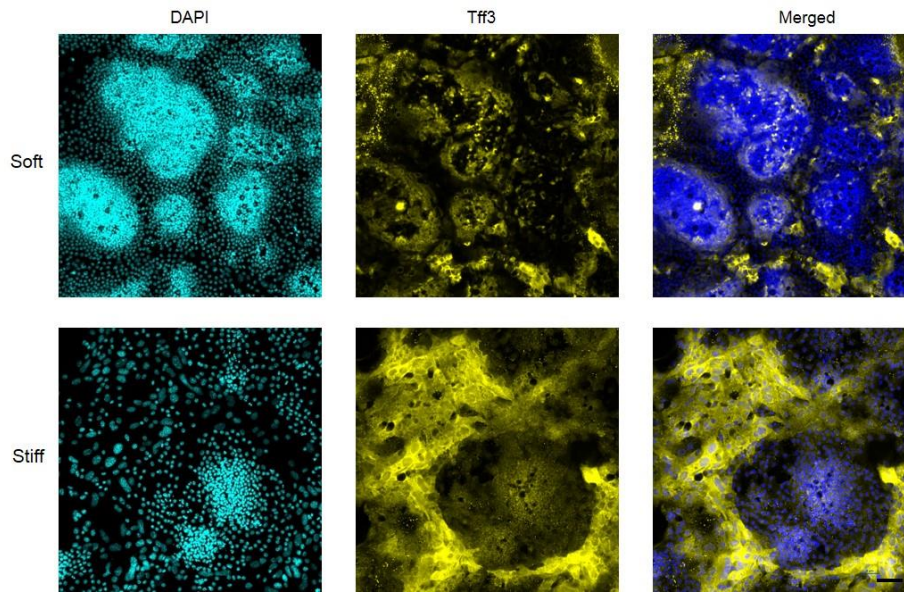

718

719 **Extended Data Figure 18.** The goblet cell marker- Tff3 was increased on the stiff matrix ( $n=3$ ). Scale  
720 bar, 25  $\mu\text{m}$ .

721

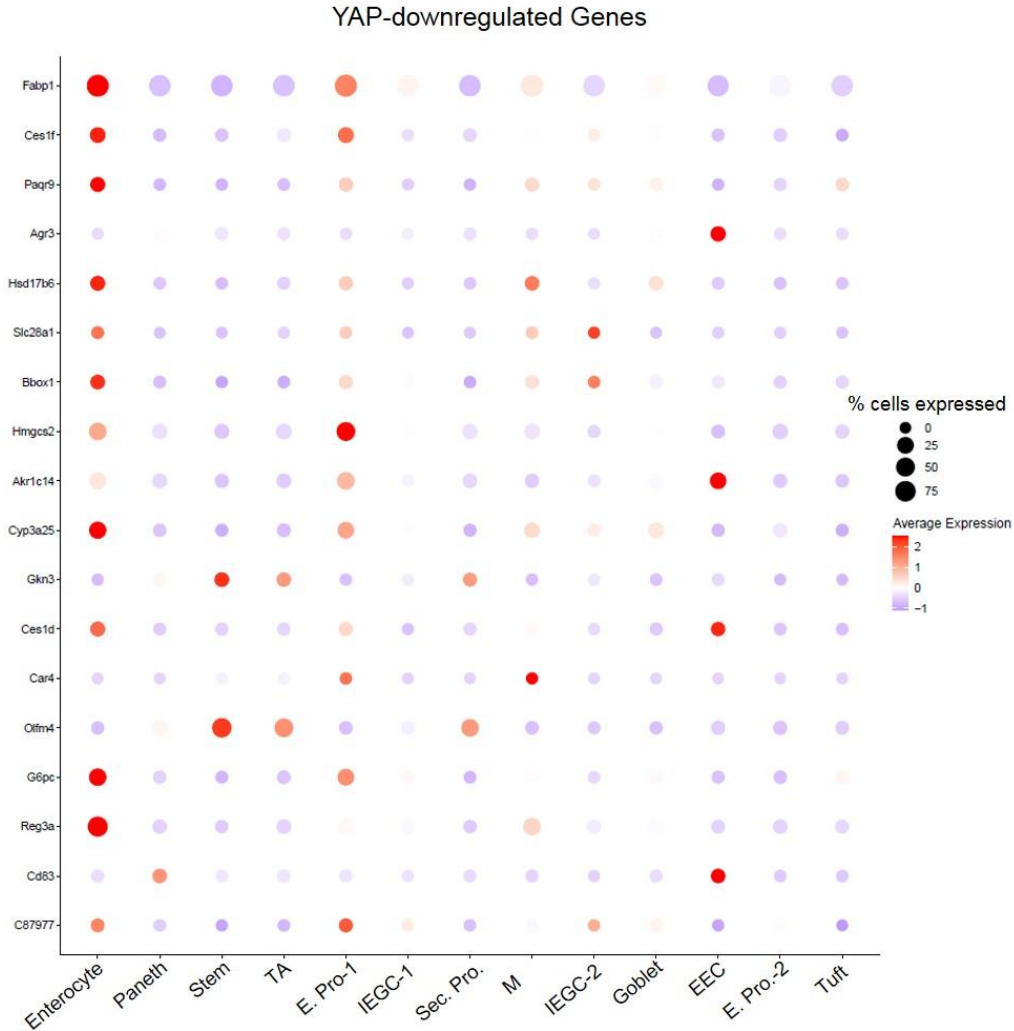

722

723 **Extended Data Figure 19.** The genes downregulated by YAP highly expressed in enterocytes and their  
724 progenitors-1 ( $n=3$ ).

725



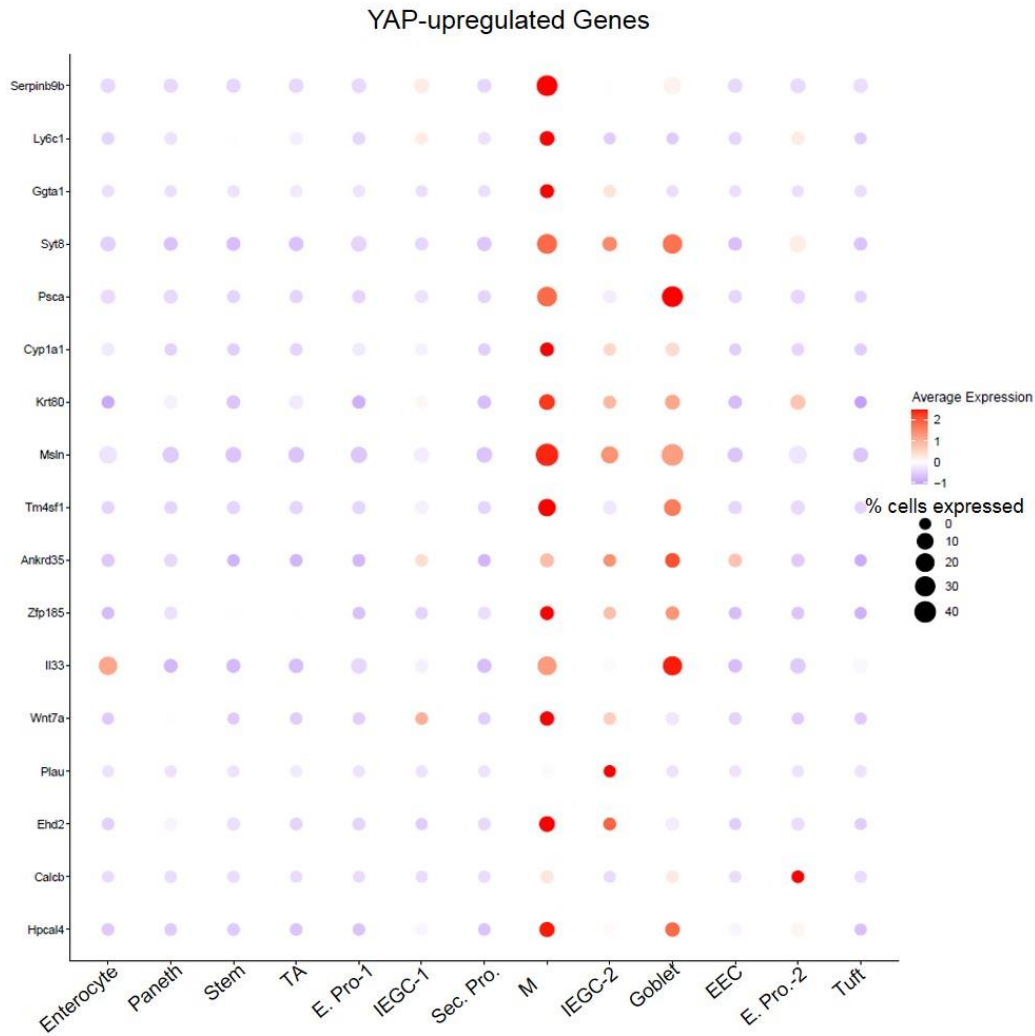

726

727 **Extended Data Figure 20.** The genes upregulated by YAP highly expressed in goblet cells, IEGCs and  
728 M cells ( $n=3$ ).

729

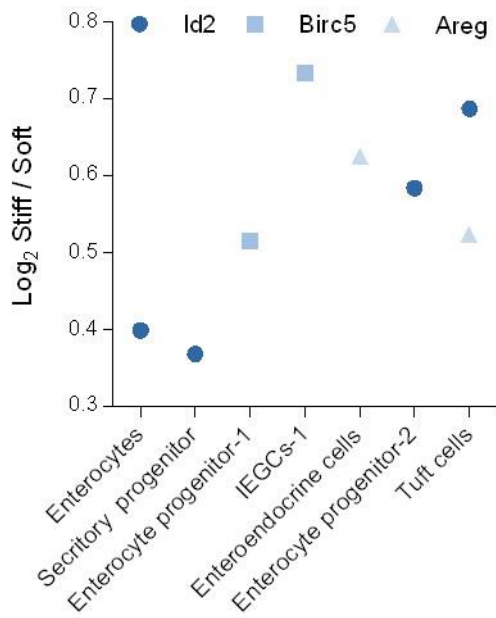

730

731 **Extended Data Figure 21.** Differential gene expressions analysis shows the changes of downstream  
732 genes of nuc-YAP ( $n=3$ ).

733

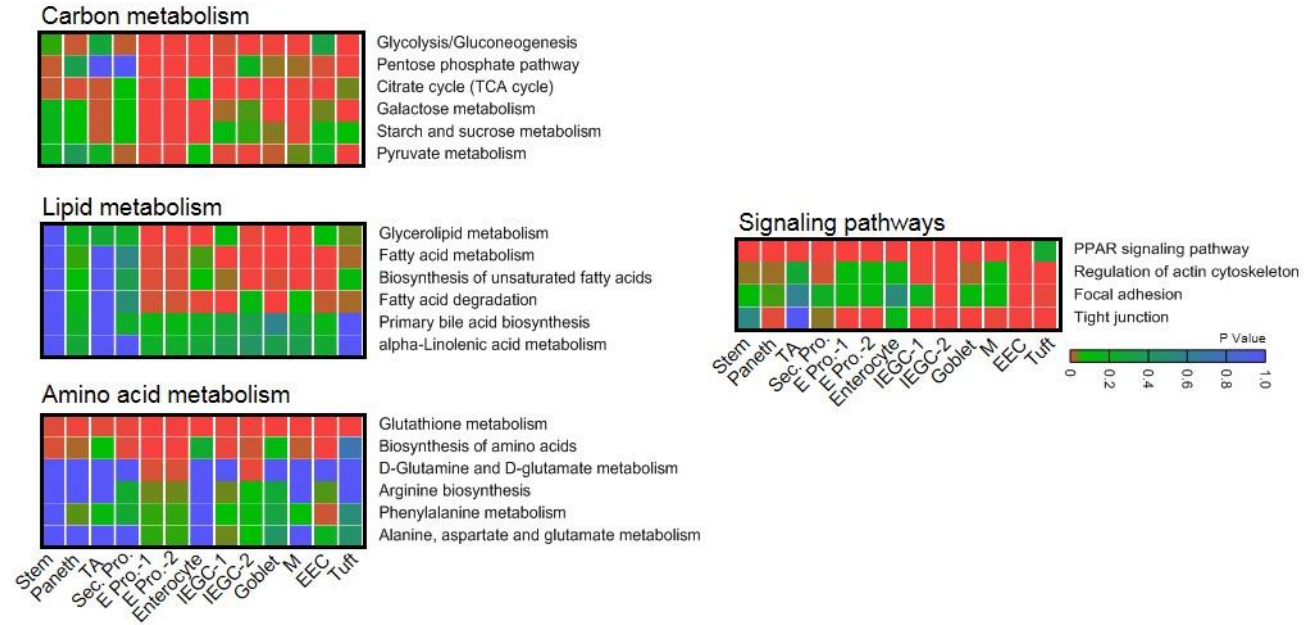

734

735 **Extended Data Figure 22.** Pathway enrichment analysis is performed for carbon metabolism, lipid  
 736 metabolism, amino acid metabolism and the signaling pathways. Compared to the soft matrix, carbon  
 737 metabolism is more enriched than amino acid metabolism on the stiff matrix. Mechenotransduction-  
 738 related signaling as well as Peroxisome proliferator-activated receptor (PPAR) was also more enriched on  
 739 the stiff matrix ( $n=3$ ).

740

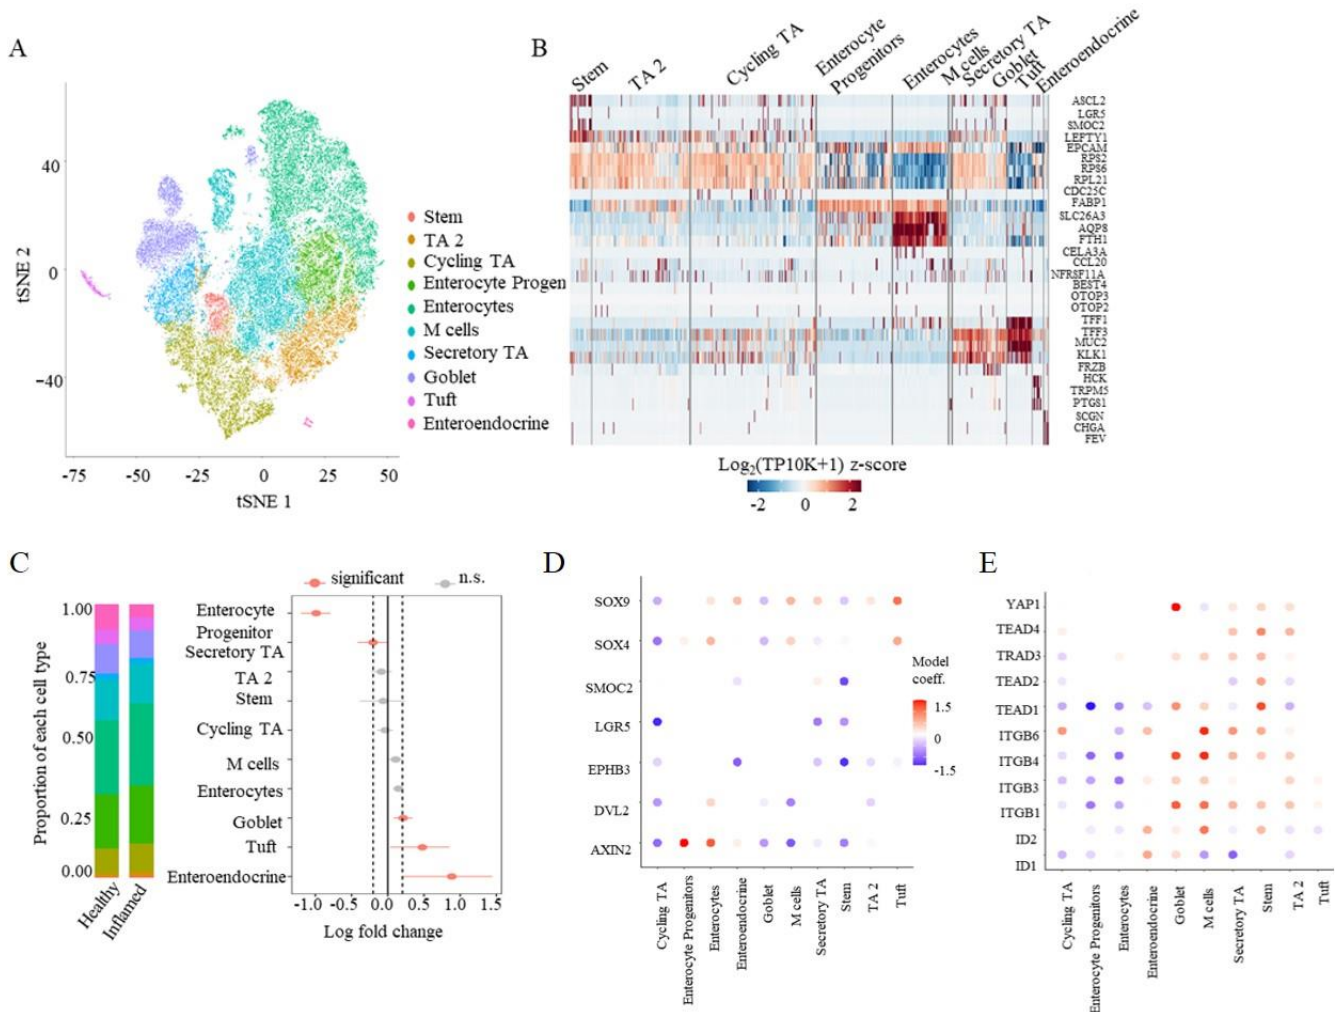

741

742 **Extended Data Figure 23.** ScRNAseq analysis from healthy tissue and inflamed tissue biopsied from  
 743 Ulcerative Colitis patients ( $n=3$ ) and healthy individuals ( $n=5$ ). (A) T-Stochastic Neighborhood  
 744 Embedding (t-SNE) of cells colored by cell type from all samples. (B) Marker genes for each cell types.  
 745 (C) Left panel: Average cell type proportions in aggregates of healthy or inflamed samples. Right panel:  
 746 Fold changes in proportion of each cell type in UC patients compared to healthy individuals. Whiskers  
 747 correspond to highest and lowest points within 1.5 interquartile range. Significant criteria,  $P<0.05$ . (D)  
 748 The Wnt pathways (e.g. Sox4, Sox9, Lgr5) suppressed specifically by YAP are downregulated in the ISCs  
 749 of UC. Model coefficient reported here is the discrete component of the hurdle model. (E) The  
 750 mechanosignaling pathway including integrin (ITGB), YAP, and TEAD is highly activated in both ISCs  
 751 and the secretive cell types of UC, but not in enterocytes.

752

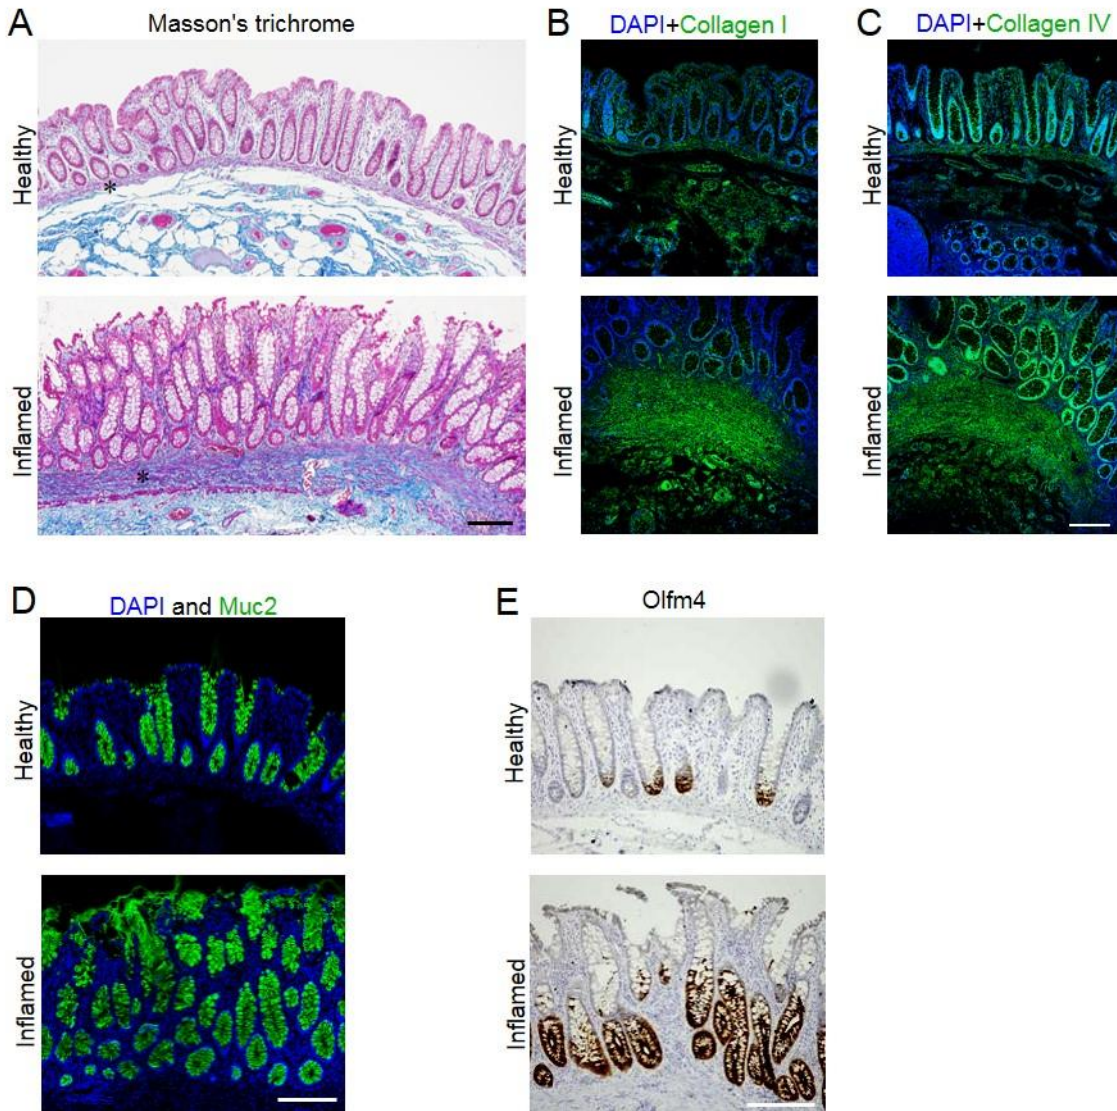

753

754 **Extended Data Figure 24.** The masson's trichrome staining (A) and the staining of collagen I (B) and  
755 Collagen IV (C) showed the fibrosis and thickening of BM and lamina propria labelled with asterisks. (D)  
756 Muc2<sup>+</sup> goblet cells increased in the inflamed colon. (E) Olfm4 was increased and expanded into larger  
757 regions in the inflamed colon. *n*=3. Scale bar, 200  $\mu$ m.

758

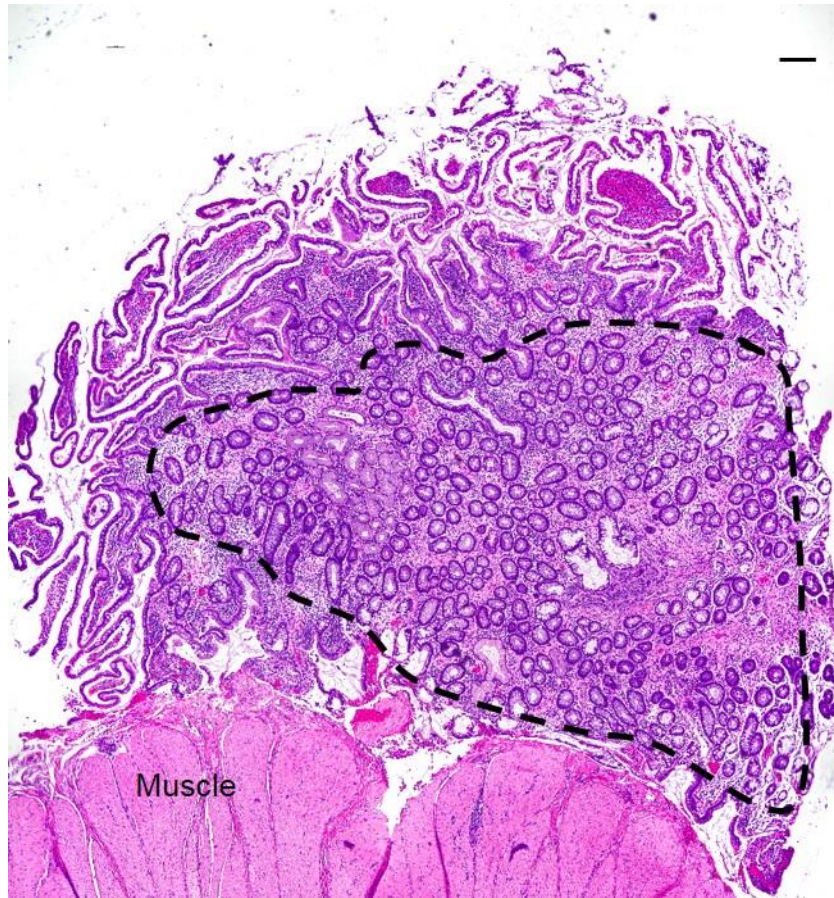

759

760

761 **Extended Data Figure 25.** In a large area (outside of the dashed line) of structured ileum (extreme  
762 fibrosis), the invaginated ISC niche- crypts nearly disappeared and only pieces of the villi were left,  
763 resembling the stiffness-reduced size of the crypt and loss of ISCs. Meanwhile, lots of ectopic crypts  
764 (inside the dashed line) formed, resembling stiffness-induced new crypt formation.  $n=1$ . Scale bar, 200  
765  $\mu\text{m}$ .

766

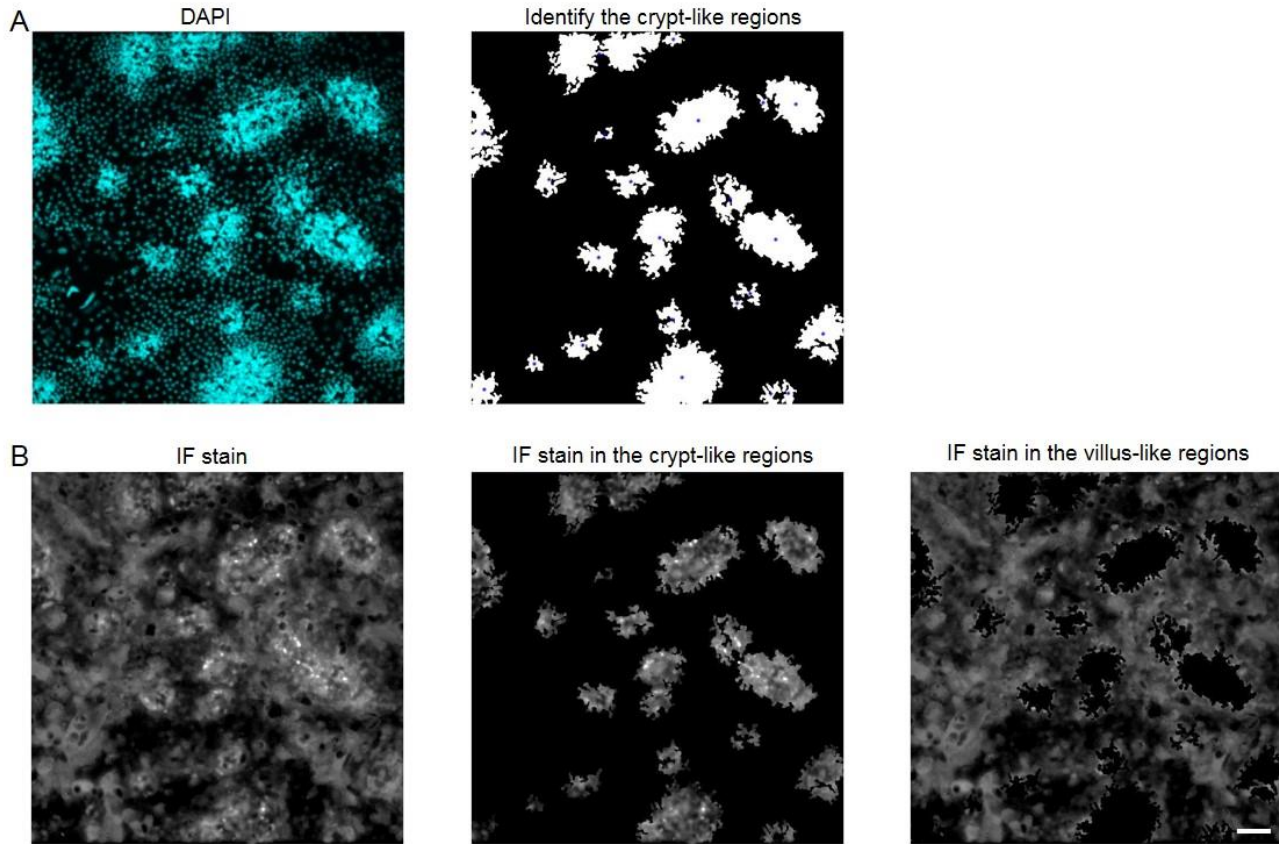

767

768 **Extended Data Figure 26.** Illustration for the customized MATLAB code. (A) The crypt-like regions

769 were identified based on the intensity of the DAPI staining. (B) The fluorescent signals were respectively

770 isolated in the crypt-like regions and the villus-like regions. Scale bar, 100  $\mu\text{m}$ .

771

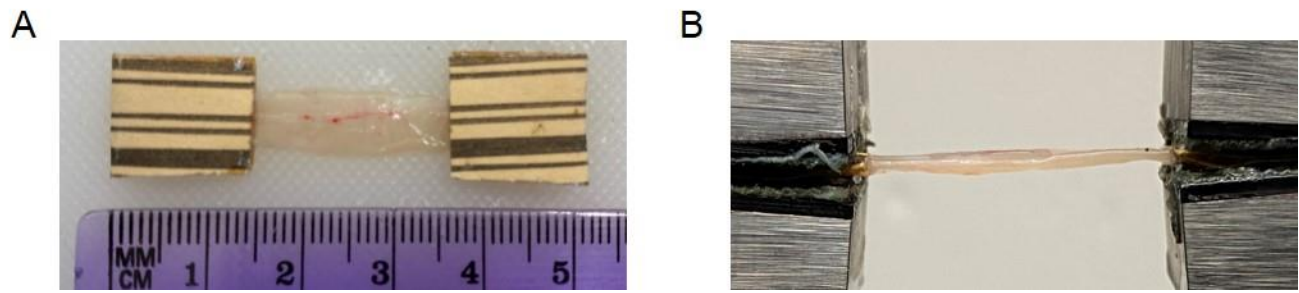

772

773

774 **Extended Data Figure 27.** (A) An intestinal tissue sample with sandpaper tabs at both ends; and (B)  
775 uniaxial tensile test of the intestinal tissue sample.

776

777
